# Independent molecular basis of convergent highland adaptation in maize

Shohei Takuno<sup>\*,1</sup>, Peter Ralph<sup>†,‡</sup>, Kelly Swarts<sup>§</sup>, Rob J. Elshire<sup>§</sup>, Jeffrey C. Glaubitz<sup>§</sup>,  
Edward S. Buckler<sup>§,\*\*</sup>, Matthew B. Hufford<sup>\*,††</sup>, and Jeffrey Ross-Ibarra<sup>\*,‡‡,2</sup>

<sup>\*</sup>Department of Plant Sciences, University of California, Davis, California 95616, USA,

<sup>†</sup>Department of Evolution and Ecology, University of California, Davis, California 95616, USA,

<sup>‡</sup>Molecular and Computational Biology, University of Southern California, Los Angeles, California 90089-0371, USA,

<sup>§</sup>Institute for Genomic Diversity, Cornell University, Ithaca, New York 14853-2703, USA,

<sup>\*\*</sup>United States Department of Agriculture Agricultural Research Service, Ithaca, NY 14853, USA,

<sup>††</sup>Department of Ecology, Evolution, and Organismal Biology, Iowa State University, Ames, Iowa 50011, USA,

<sup>‡‡</sup>The Center for Population Biology and the Genome Center, University of California, Davis, California 95616, USA,

<sup>1</sup> Present address: SOKENDAI (Graduate university for advanced studies), Hayama, Kanagawa 240-0193, Japan

January 9, 2015

**ABSTRACT** Convergent evolution occurs when multiple species/subpopulations adapt to similar environments via similar phenotypes. We investigate here the molecular basis of convergent adaptation in maize to highland climates in Mexico and South America using genome-wide SNP data. Taking advantage of archaeological data on the arrival of maize to the highlands, we infer demographic models for both populations, identifying evidence of a strong bottleneck and rapid expansion in South America. We use these models to then identify loci showing an excess of differentiation as a means of identifying putative targets of natural selection, and compare our results to expectations from recently developed theory on convergent adaptation. Consistent with predictions across a wide array of parameter space, we see limited evidence for convergent evolution at the nucleotide level in spite of strong similarities in overall phenotypes. Instead, we show that selection appears to have predominantly acted on standing genetic variation, and that introgression from wild teosinte populations appears to have played a role in highland adaptation in Mexican maize.

## Introduction

Convergent evolution occurs when multiple species or populations exhibit similar phenotypic adaptations to comparable environmental challenges (Wood *et al.* 2005; Arendt and Reznick 2008; Elmer and Meyer 2011). Evolutionary genetic analysis of a wide range of species has provided evidence for multiple pathways of convergent evolution. One such route occurs when identical mutations arise independently and fix via natural selection in multiple populations. In humans, for example, malaria resistance due to mutations from Glu to Val at the sixth codon of the  $\beta$ -globin gene has arisen independently on multiple unique haplotypes (Curat *et al.* 2002; Kwiatkowski 2005). Convergent evolution can also be achieved when different mutations arise within the same locus yet produce similar phenotypic effects. Grain fragrance in rice appears to have evolved along these lines, as populations across East Asia have similar fragrances resulting from at least eight distinct loss-of-function

alleles in the *BADH2* gene (Kovach *et al.* 2009). Finally, convergent evolution may arise from natural selection acting on standing genetic variation in an ancestral population. In the three-spined stickleback, natural selection has repeatedly acted to reduce armor plating in independent colonizations of freshwater environments. Adaptation in these populations occurred both from new mutations as well as standing variation at the *Eda* locus in marine populations (Colosimo *et al.* 2005).

Not all convergent phenotypic evolution is the result of convergent evolution at the molecular level, however. Recent studies of adaptation to high elevation in humans, for example, reveal that the genes involved in highland adaptation are largely distinct among Tibetan, Andean and Ethiopian populations (Bigham *et al.* 2010; Scheinfeldt *et al.* 2012; Alkorta-Aranburu *et al.* 2012). While observations of independent origin may be due to a complex genetic architecture or standing genetic variation, introgression from related populations may also play a role. In Tibetan populations, the adaptive allele at the *EPAS1* locus appears to have arisen via introgression from Denisovans, a related hominid group (Huerta-Sánchez *et al.* 2014). Overall, we still know relatively little about how convergent phenotypic

<sup>2</sup>Corresponding author: Department of Plant Sciences, University of California, Davis, California 95616, USA. E-mail: rossibarra@ucdavis.edu

evolution is driven by common genetic changes or the relative frequencies of these different routes of convergent evolution.

The adaptation of maize to high elevation environments (*Zea mays* ssp. *mays*) provides an excellent opportunity to investigate the molecular basis of convergent evolution. Maize was domesticated from the wild teosinte *Zea mays* ssp. *parviglumis* (hereafter *parviglumis*) in the lowlands of southwest Mexico ~9,000 years before present (BP) (Matsuoka *et al.* 2002; Piperno *et al.* 2009; van Heerwaarden *et al.* 2011). After domestication, maize spread rapidly across the Americas, reaching the lowlands of South America and the high elevations of the Mexican Central Plateau by ~ 6,000 BP (Piperno 2006), and the Andean highlands by ~ 4,000 BP (Perry *et al.* 2006; Grobman *et al.* 2012). The transition from lowland to highland habitats spanned similar environmental gradients in Mesoamerica and S. America (Figure S1) and presented a host of novel challenges that often accompany highland adaptation including reduced temperature, increased ultraviolet radiation, and reduced partial pressure of atmospheric gases (Körner 2007).

Common garden experiments in Mexico reveal that highland maize has successfully adapted to high elevation conditions (Mercer *et al.* 2008), and phenotypic comparisons between Mesoamerican and S. American populations are suggestive of convergent evolution. Maize landraces (open-pollinated traditional varieties) from both populations share a number of phenotypes not found in lowland populations, including dense macrohairs and stem pigmentation (Wilkes 1977; Wellhausen *et al.* 1957) and differences in tassel branch and ear husk number (Brewbaker 2014), and biochemical response to UV radiation (Casati and Walbot 2005). In spite of these shared phenotypes, genetic analyses of maize landraces from across the Americas indicate that the two highland populations are independently derived from their respective lowland populations (Vigouroux *et al.* 2008; van Heerwaarden *et al.* 2011), suggesting that observed patterns of phenotypic similarity are not simply due to recent shared ancestry.

In addition to convergent evolution between maize landraces, a number of lines of evidence suggest convergent evolution in the related wild teosintes. *Zea mays* ssp. *mexicana* (hereafter *mexicana*) is native to the highlands of central Mexico, where it is thought to have occurred since at least the last glacial maximum (Ross-Ibarra *et al.* 2009; Hufford *et al.* 2012a). Phenotypic differences between *mexicana* and the lowland *parviglumis* mirror those between highland and lowland maize (Lauter *et al.* 2004), and population genetic analyses of the two subspecies reveal evidence of natural selection associated with altitudinal differences between *mexicana* and *parviglumis* (Pyhäjärvi *et al.* 2013; Fang *et al.* 2012). Landraces in the highlands of Mexico are often found in sympatry with *mexicana* and gene flow from *mexicana* likely contributed to maize adaptation to the highlands (Hufford *et al.* 2013). No wild *Zea* occur in S. America, and S. American landraces show no evidence of gene flow from Mexican teosinte (van Heerwaarden *et al.* 2011), further suggesting independent origins for altitude-

adapted traits.

Here we use genome-wide SNP data from Mesoamerican and S. American landraces to investigate the evidence for convergent evolution to highland environments at the molecular level. We estimate demographic histories for maize in the highlands of Mesoamerica and S. America, then use these models to identify loci that may have been the target of selection in each population. We find a large number of sites showing evidence of selection, consistent with a complex genetic architecture involving many phenotypes and numerous loci. We see little evidence for shared selection across highland populations at the nucleotide or gene level, a result we show is consistent with expectations from recent theoretical work on convergent adaptation (Ralph and Coop 2014). Instead, our results support a role of adaptive introgression from teosinte in Mexico and highlight the contribution of standing variation to adaptation in both populations.

## Materials and Methods

### Materials and DNA extraction

We included one individual from each of 94 open-pollinated landrace maize accessions from high and low elevation sites in Mesoamerica and S. America (Table S1). Accessions were provided by the USDA germplasm repository or kindly donated by Major Goodman (North Carolina State University). Sampling locations are shown in Figure 1A. Landraces sampled from elevations < 1,700 m were considered lowland, while accessions from > 1,700 m were considered highland. Seeds were germinated on filter paper following fungicide treatment and grown in standard potting mix. Leaf tips were harvested from plants at the five leaf stage. Following storage at -80°C overnight, leaf tips were lyophilized for 48 hours. Tissue was then homogenized with a Mini-Beadbeater-8 (BioSpec Products, Inc., Bartlesville, OK, USA). DNA was extracted using a modified CTAB protocol (Saghai-Marooif *et al.* 1984). The quality of DNA was ensured through inspection on a 2% agarose gel and quantification of the ratio of light absorbance at 260 and 280 nm using a NanoDrop spectrophotometer (Thermo Scientific, NanoDrop Products, Wilmington, DE, USA).

### SNP data

We generated two complementary SNP data sets for the sampled maize landraces. The first set was generated using the Illumina MaizeSNP50 BeadChip platform, including 56,110 SNPs (Ganal *et al.* 2011). SNPs were clustered with the default algorithm of the GenomeStudio Genotyping Module v1.0 (Illumina Inc., San Diego, CA, USA) and then visually inspected and manually adjusted. These data are referred to as “MaizeSNP50” hereafter. This array contains SNPs discovered in multiple ascertainment schemes (Ganal *et al.* 2011), but the vast majority of SNPs come from polymorphisms distinguishing the maize inbred lines B73 and Mo17 (14,810 SNPs)

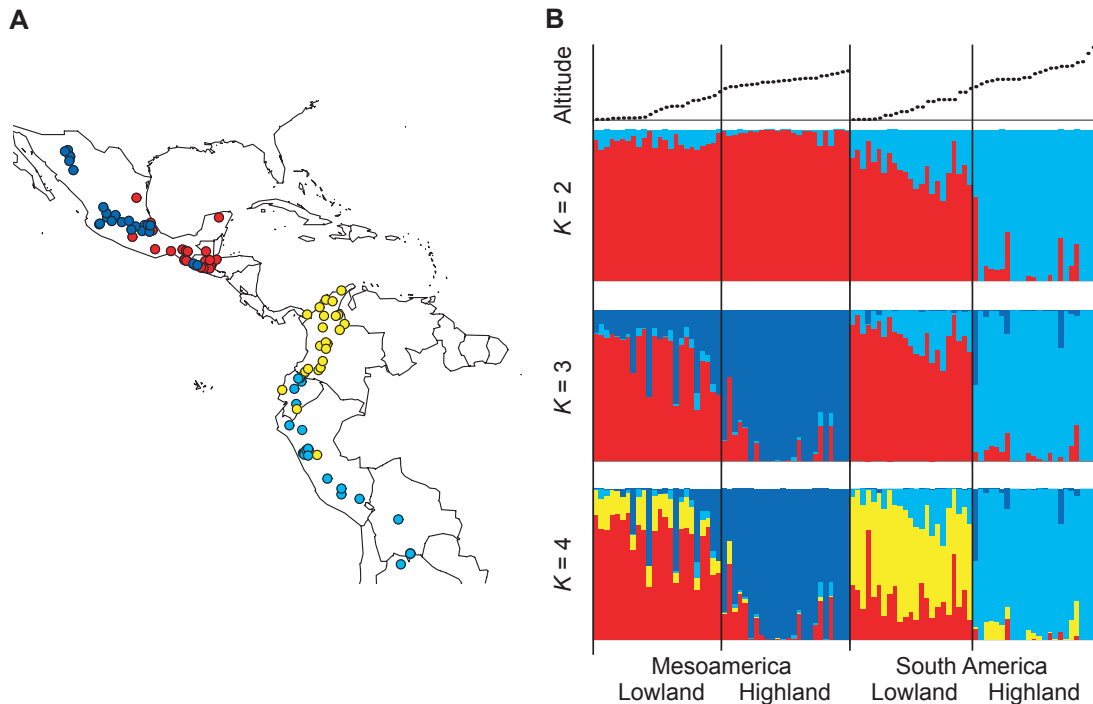

**Figure 1** (A) Sampling locations of landraces. Red, blue, yellow and light blue dots represent Mesoamerican lowland, Mesoamerican highland, S. American lowland and S. American highland populations, respectively. (B) Results of STRUCTURE analysis of the maizeSNP50 SNPs with  $K = 2 \sim 4$ . The top panel shows the elevation, ranging from 0 to 4,000 m on the y-axes. The colors in  $K = 4$  correspond to those in panel (A).

or identified from sequencing 25 diverse maize inbred lines (40,594 SNPs; Gore *et al.* 2009).

The second data set was generated for a subset of 87 of the landrace accessions (Table S1) utilizing high-throughput Illumina sequencing data via genotyping-by-sequencing (GBS; Elshire *et al.* 2011). Genotypes were called using TASSEL-GBS (Glaubitz *et al.* 2014) resulting in 2,848,284 SNPs with an average of 71.3% missing data per individual.

To assess data quality, we compared genotypes at the 7,197 SNPs (229,937 genotypes, excluding missing data) that overlap between the MaizeSNP50 and GBS data sets. While only 0.8% of 173,670 comparisons involving homozygous MaizeSNP50 genotypes differed in the GBS data, 88.6% of 56,267 comparisons with MaizeSNP50 heterozygotes differed, nearly always being reported as a homozygote in GBS. Despite this high heterozygote error rate, the high correlation in allele frequencies between data sets ( $r = 0.89$ ; Figure S2) supports the utility of the GBS data set for estimating allele frequencies.

We annotated SNPs using the filtered gene set from Ref-Gen version 2 of the maize B73 genome sequence (Schnable *et al.* 2009; release 5b.60) from [maizesequence.org](http://maizesequence.org). We excluded genes annotated as transposable elements (84) and pseudogenes (323) from the filtered gene set, resulting in a total of 38,842 genes.

### Structure analysis

We performed a STRUCTURE analysis (Pritchard *et al.* 2000; Falush *et al.* 2003) using synonymous and noncoding SNPs from the MaizeSNP50 data. We randomly pruned SNPs closer than 10 kb and assumed free recombination between the remaining SNPs. Alternative distances were tried with nearly identical results. We excluded SNPs in which the number of heterozygous individuals exceeded homozygotes and where the  $P$ -value for departure from Hardy-Weinberg Equilibrium (HWE) using all individuals was smaller than 0.05 based on a  $G$ -test. Following these data thinning measures, 17,013 biallelic SNPs remained. We conducted three replicate runs of STRUCTURE using the correlated allele frequency model with admixture for  $K = 2$  through  $K = 6$  populations, a burn-in length of 50,000 iterations and a run length of 100,000 iterations. Results across replicates were nearly identical.

### Historical population size

We tested three models in which maize was differentiated into highland and lowland populations subsequent to domestication (Figure 2).

Observed joint frequency distributions (JFDs) were calculated using the GBS data set due to its lower level of ascertainment bias. A subset of synonymous and noncoding SNPs were utilized that had  $\geq 15$  individuals without missing data in both lowland and highland populations and did not violate HWE. A

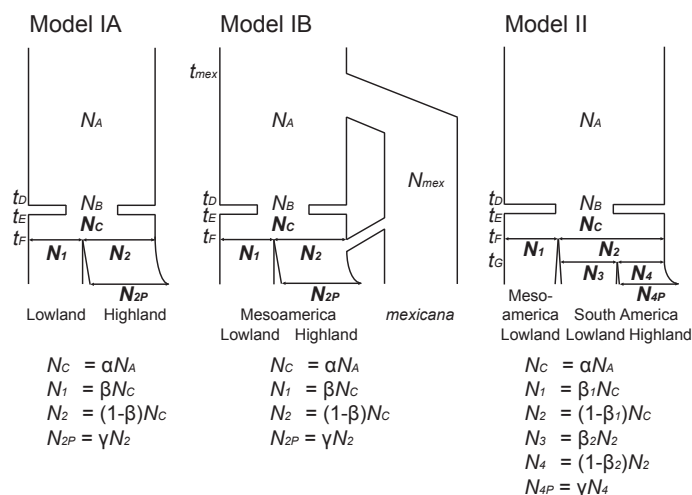

**Figure 2** Models of historical population size for lowland and highland populations. Parameters in bold were estimated in this study. See text for details.

HWE cut-off of  $P < 0.005$  was used for each subpopulation due to our under-calling of heterozygotes.

We obtained similar results under more or less stringent thresholds for significance ( $P < 0.05 \sim 0.0005$ ; data not shown), though the number of SNPs was very small at  $P < 0.05$ .

Parameters were inferred with the software  $\delta a \delta i$  (Gutenkunst *et al.* 2009), which uses a diffusion method to calculate an expected JFD and evaluates the likelihood of the data assuming multinomial sampling. We did not use the “full” model that incorporates all four populations because parameter estimation under this model is computationally infeasible.

**Model IA** This model is applied separately to both the Mesoamerican and the S. American populations. We assume the ancestral diploid population representing *parviglumis* follows a standard Wright-Fisher model with constant size. The size of the ancestral population is denoted by  $N_A$ . At  $t_D$  generations ago, the bottleneck event begins at domestication, and at  $t_E$  generations ago, the bottleneck ends. The population size and duration of the bottleneck are denoted by  $N_B$  and  $t_B = t_D - t_E$ , respectively. The population size recovers to  $N_C = \alpha N_A$  in the lowlands. Then, the highland population is differentiated from the lowland population at  $t_F$  generations ago. The size of the lowland and highland populations at time  $t_F$  is determined by a parameter  $\beta$  such that the population is divided by  $\beta N_C$  and  $(1-\beta)N_C$ ; our conclusions hold if we force lowland population size to remain at  $N_C$  (data not shown).

We assume that the population size in the lowlands is constant but that the highland population experiences exponential expansion after divergence: its current population size is  $\gamma$  times larger than that at  $t_F$ .

**Model IB** We expand Model IA for the Mesoamerican populations by incorporating admixture from the teosinte *mexicana* to the highland Mesoamerican maize population. The time of differentiation between *parviglumis* and *mexicana* occurs at  $t_{mex}$  generations ago. The *mexicana* population size is assumed to be constant at  $N_{mex}$ . At  $t_F$  generations ago, the Mesoamerican highland population is derived from admixture between the Mesoamerican lowland population and a portion  $P_{mex}$  from the teosinte *mexicana*.

**Model II** The final model includes the Mesoamerican lowland, S. American lowland and highland populations. This model was used for simulating SNPs with ascertainment bias (see below). At time  $t_F$ , the Mesoamerican and S. American lowland populations are differentiated, and the sizes of populations after splitting are determined by  $\beta_1$ . At time  $t_G$ , the S. American lowland and highland populations are differentiated, and the sizes of populations at this time are determined by  $\beta_2$ . As in Model IA, the S. American highland population is assumed to experience population growth with the parameter  $\gamma$ .

Estimates of a number of our model parameters were available from previous work.  $N_A$  was set to 150,000 using estimates of the composite parameter  $4N_A\mu \sim 0.018$  from *parviglumis* (Eyre-Walker *et al.* 1998; Tenaillon *et al.* 2001, 2004; Wright *et al.* 2005; Ross-Ibarra *et al.* 2009) and an estimate of the mutation rate  $\mu \sim 3 \times 10^{-8}$  (Clark *et al.* 2005) per site per generation. The severity of the domestication bottleneck is represented by  $k = N_B/t_B$  (Eyre-Walker *et al.* 1998; Wright *et al.* 2005), and following Wright *et al.* (2005) we assumed  $k = 2.45$  and  $t_B = 1,000$  generations. Taking into account archaeological evidence (Piperno *et al.* 2009), we assume  $t_D = 9,000$  and  $t_E = 8,000$ . We further assumed  $t_F = 6,000$  for Mesoamerican populations in Models IA and IB (Piperno 2006),  $t_F = 4,000$  for S. American populations in Model IA (Perry *et al.* 2006; Grobman *et al.* 2012), and  $t_{mex} = 60,000$ ,  $N_{mex} = 160,000$  (Ross-Ibarra *et al.* 2009), and  $P_{mex} = 0.2$  (van Heerwaarden *et al.* 2011) for Model IB. For both Models IA and IB, we inferred three parameters ( $\alpha$ ,  $\beta$  and  $\gamma$ ), and, for Model II, we fixed  $t_F = 6,000$  and  $t_G = 4,000$  (Piperno 2006; Perry *et al.* 2006; Grobman *et al.* 2012) and estimated the remaining four parameters ( $\alpha$ ,  $\beta_1$ ,  $\beta_2$  and  $\gamma$ ).

### Population differentiation

We used our inferred models of population size change to generate a null distribution of  $F_{ST}$ . As implemented in  $\delta a \delta i$  (Gutenkunst *et al.* 2009), we calculated an expected JFD given estimated model parameters and the sample sizes from our highland and lowland populations. Then, we converted the JFD into the distribution of  $F_{ST}$  values. The  $P$ -value of a SNP was

calculated by  $P(F_{ST,E} \geq F_{ST,O} | p \pm 0.025) = P(F_{ST,E} \geq F_{ST,O} \cap p \pm 0.025) / P(p \pm 0.025)$ , where  $F_{ST,O}$  and  $F_{ST,E}$  are observed and expected  $F_{ST}$  values and  $p \pm 0.025$  is the set of loci with mean allele frequency across both highland and lowland populations within 0.025 of the SNP in question.

Generating the null distribution of differentiation for the MaizeSNP50 data requires accounting for ascertainment bias. Evaluation of genetic clustering in our data (not shown) coincides with previous work (Hufford *et al.* 2012b) in suggesting that the two inbred lines most important in the ascertainment panel (B73 and Mo17) are most closely related to Mesoamerican lowland maize. We thus added two additional individuals to the Mesoamerican lowland population and generated our null distribution using only SNPs for which the two individuals had different alleles. For model IA in S. America we added two individuals at time  $t_F$  to the ancestral population of the S. American lowland and highland populations because the Mesoamerican lowland population was not incorporated into this model. For each combination of sample sizes in lowland and highland populations, we generated a JFD from  $10^7$  SNPs using the software *ms* (Hudson 2002). Then, we calculated  $P$ -values from the JFD in the same way. We calculated  $F_{ST}$  values for all SNPs that had  $\geq 10$  individuals with no missing data in all four populations and showed no departure from HWE at the 0.5% (GBS) or 5% (MaizeSNP50) level.

### Haplotype sharing test

We performed a pairwise haplotype sharing (PHS) test to detect further evidence of selection, following Toomajian *et al.* (2006). To conduct this test, we first imputed and phased the combined SNP data (both GBS and MaizeSNP50) using the *fastPHASE* software version 1.4.0 (Scheet and Stephens 2006). As a reference for phasing, we used data (excluding heterozygous SNPs) from an Americas-wide sample of 23 partially inbred landraces from the Hapmap v2 data set (Chia *et al.* 2012). We ran *fastPHASE* with default parameter settings. PHS was calculated for an allele  $A$  at position  $x$  by

$$PHS_{xA} = \sum_{i=1}^{p-1} \sum_{j=i+1}^p \frac{Z_{ijx}}{\binom{p}{2}} - \sum_{i=1}^{n-1} \sum_{j=i+1}^n \frac{Z_{ijx}}{\binom{n}{2}}, \quad (1)$$

where  $n$  is the sample size of haploids,  $p$  is the number of haploids carrying the allele  $A$  at position  $x$ , and

$$Z_{ijx} = \frac{d_{ijx} - \bar{d}_{ij}}{\sigma_{ij}}, \quad (2)$$

where  $d_{ijx}$  is the genetic distance over which individuals  $i$  and  $j$  are identical surrounding position  $x$ ,  $\bar{d}_{ij}$  is the genome-wide mean of distances over which individuals  $i$  and  $j$  are identical, and  $\sigma_{ij}$  is the standard deviation of the distribution of distances. To identify outlying PHS values, we used the empirical

quantile, calculated as the proportion of alleles of the same frequency genome-wide that have a larger PHS value.

Genetic distances were obtained for the MaizeSNP50 data (Ganal *et al.* 2011) and fit using a tenth degree polynomial curve to all SNPs (data not shown).

### Theoretical evaluation of convergent evolution

We build on results from Ralph and Coop (2014) to assess whether the abundance and degree of coincidence of presumably adaptive high- $F_{ST}$  alleles is consistent with what is known about the population history of maize. To do this, we evaluated the rate at which we expect an allele that provides a selective advantage at higher elevation to arise by new mutation in a highland region ( $\lambda_{mut}$ ), and the rate at which such an allele already present in the Mesoamerican highlands would transit the intervening lowlands and fix in the Andean highlands ( $\lambda_{mig}$ ). We first assume alleles adapted in the highlands are slightly deleterious at lower elevation, consistent with empirical findings in reciprocal transplant experiments in Mexico (Mercer *et al.* 2008). The resulting values of  $\lambda_{mut}$  and  $\lambda_{mig}$  depend most strongly on the population density, the selection coefficient, and the rate at which seed is transported long distances and replanted; we checked the results by evaluating several choices of these parameters as well as with simulations and more detailed computations, described in the Appendix. Here we describe the mathematical details; readers may skip to the results without loss of continuity.

**Demographic model** Throughout, we followed van Heerwaarden *et al.* (2010) in constructing a detailed demographic model for domesticated maize. We assume fields of  $N = 10^5$  plants are replanted each year from  $N_f = 561$  ears, either from completely new stock (with probability  $p_e = 0.068$ ), from partially new stock (a proportion  $r_m = 0.2$  with probability  $p_m = 0.02$ ), or otherwise entirely from the same field. Each plant is seed parent to all kernels of its own ears, but can be pollen parent to kernels in many other ears; a proportion  $m_g = 0.0083$  of the pollen-parent kernels are in other fields. Wild-type plants have an average of  $\mu_E = 3$  ears per plant, and ears have an average of  $N/N_f$  kernels; each of these numbers are Poisson distributed. The mean number of pollen-parent kernels, and the mean number of kernels per ear, is assumed to be  $(1 + s_b)$  times larger for individuals heterozygous for the selected allele. (The fitness of homozygotes is assumed to not affect the probability of establishment.) Migration is mediated by seed exchange – when fields are replanted from new stock, the seed is chosen from a random distance away with mean  $\sigma_s = 50$ km, but plants only pollinate other plants belonging to the same village (distance 0). The mean numbers of each category of offspring (seed/pollen; migrant/nonmigrant) are determined by the condition that the population is stable (i.e. wild-type, diploid individuals have on average 2 offspring) except that heterozygotes have on average  $(1 + s_b)$  offspring that carry

the selected allele. Each ear has a small chance of being chosen for replanting, so the number of ears replanted of a given individual is Poisson, and assuming that pollen is well-mixed, the number of pollen-parent kernels is Poisson as well. Each of these numbers of offspring has a mean that depends on whether the field is replanted with new stock, and whether ears are chosen from this field to replant other fields, so the total number of offspring is a mixture of Poissons. These means, and more details of the computations, are found in the Appendix. At the parameter values given, the variance in number of offspring,  $\xi^2$ , is between 20 (for wild-type) and 30 (for  $s_b = 0.1$ ), and the dispersal distance (mean distance between parent and offspring) is  $\sigma = 3.5\text{km}$ .

**New mutations** The rate at which new mutations appear and fix in a highland population, which we denote  $\lambda_{\text{mut}}$ , is approximately equal to the total population size of the highlands multiplied by the mutation rate per generation and the chance that a single such mutation successfully fixes (i.e. is not lost to drift). The probability that a single new mutant allele providing benefit  $s_b$  to heterozygotes at high elevation will fix locally in the high elevation population is approximately  $2s_b$  divided by the variance in offspring number (Jagers 1975). The calculation above is not quite correct, as it neglects migration across the altitudinal gradient, but exact numerical calculation of the chance of fixation of a mutation as a function of the location where it first appears indicates that the approximation is quite good (see Figure A1); for theoretical treatment see Barton (1987).

Concretely, the probability that a new mutation destined for fixation will arise in a patch of high-elevation habitat of area  $A$  in a given generation is a function of the density of maize per unit area  $\rho$ , the selective benefit  $s_b$  it provides, the mutation rate  $\mu$ , and the variance in offspring number  $\xi^2$ . In terms of these parameters, the rate of appearance is

$$\lambda_{\text{mut}} = \frac{2\mu\rho A s_b}{\xi^2}. \quad (3)$$

For estimation of  $A$  in South America we overlaid raster layers of altitude ([www.worldclim.org](http://www.worldclim.org)) and extent of maize cultivation ([www.earthstat.org](http://www.earthstat.org)) and calculated the total area of maize cultivated above 1700m using functions in the raster package for R.

**Migration** A corresponding expression for the chance that an allele moves from one highland population to another is harder to intuit, and is addressed in more depth in Ralph and Coop (2014). If an allele is beneficial at high elevation and fixed in the Mesoamerican highlands but is deleterious at low elevations, then at equilibrium it will be present at low frequency at migration-selection balance in nearby lowland populations (Haldane 1948; Slatkin 1973). This equilibrium frequency decays exponentially with distance, so that the highland allele is present at distance  $R$  from the highlands at fre-

quency  $C \exp(-R\sqrt{2s_m}/\sigma)$ , where  $s_m$  is the deleterious selection coefficient for the allele in low elevation,  $\sigma$  is the mean dispersal distance, and  $C$  is a constant depending on geography ( $C \approx 1/2$  is close). Multiplying this frequency by a population size gets the predicted number (average density across a large number of generations) of individuals carrying the allele. Therefore, in a lowland population of size  $N$  at distance  $R$  from the highlands,  $(N/2) \exp(-R\sqrt{2s_m}/\sigma)$  is equal to the probability that there are any highland alleles present, multiplied by the expected number of these given that some are present. Since we assume the allele is deleterious in the lowlands, if  $R$  is large there are likely none present; but if there are, the expected number is of order  $1/s_m$  (Geiger 1999; Ralph and Coop 2014). This therefore puts an upper bound on the rate of migration of

$$\lambda_{\text{mig}} \leq (s_m N/2) \exp(-R\sqrt{2s_m}/\sigma), \quad (4)$$

and we would need to wait  $T_{\text{mig}} = 1/\lambda_{\text{mig}}$  generations for a rare such excursion to occur. This calculation omits the probability that such an allele fixes ( $\approx 2s_b/\xi^2$ ) (which is covered in the more complete form of the Appendix) and the time to reach migration-selection balance (discussed in the next section); both of these omissions mean we underestimate  $T_{\text{mig}}$ .

**Neutral alleles** The above analysis required that alleles be deleterious in the lowlands, and neglected the time to reach migration-selection equilibrium. It is therefore helpful to consider the complementary case of an allele that is neutral in the lowlands. For maize in the Andean highlands to have inherited a highland-adapted allele from the Mesoamerican highlands, those Andean plants must be directly descended from highland Mesoamerican plants that lived more recently than the appearance of the adaptive allele. In other words, the ancestral lineages along which the modern Andean plants have inherited at that locus must trace back to the Mesoamerican highlands. If the allele is neutral in the lowlands, we can treat the movement of these lineages as a neutral process, using the framework of coalescent theory (Wakeley 2005). To do this, we need to follow *all* of the  $N \approx 2.5 \times 10^6$  lineages backwards. These quickly coalesce to fewer lineages; but this turns out to not affect the calculation much. Assuming demographic stationarity, the motion of each lineage can be modeled as a random walk, whose displacement after  $m$  generations has variance  $m\sigma^2$ , and for large  $m$  is approximately Gaussian. If we assume that lineages move independently, and  $Z_n$  is the distance to the furthest of  $n$  lineages, then  $Z_n \leq \sqrt{m\sigma^2}(\sqrt{2\log n} + \sqrt{2/\log n})$  with very high probability (Berman 1964).

Since this depends only on the logarithm of  $n$ , the number of lineages, the practical upshot of this is that the most distant lineage is very unlikely to be more than about 6 times more distant than the typical lineage, even among  $10^7$  lineages. Lineages are not independent, but this only makes this calculation conservative. Therefore, an area today (say, the Andean highlands) is very unlikely to draw any ancestry from a region more

**Table 1**  $F_{ST}$  of synonymous and noncoding GBS SNPs

|             |           | Mesoamerica |           | S. America |           |
|-------------|-----------|-------------|-----------|------------|-----------|
|             |           | Lowlands    | Highlands | Lowlands   | Highlands |
| Mesoamerica | Lowlands  | –           |           |            |           |
|             | Highlands | 0.0244      | –         |            |           |
| S. America  | Lowlands  | 0.0227      | 0.0343    | –          |           |
|             | Highlands | 0.0466      | 0.0534    | 0.0442     | –         |

**Table 2** Estimated parameters of population size model

| Mesoamerica | Model IA   |          | Model IB   |          |
|-------------|------------|----------|------------|----------|
|             | Likelihood | –5592.80 | Likelihood | –4654.79 |
|             | $N_C$      | 138,000  | $N_C$      | 225,000  |
|             | $N_1$      | 52,440   | $N_1$      | 171,000  |
|             | $N_2$      | 85,560   | $N_2$      | 54,000   |
|             | $N_{2P}$   | 85,560   | $N_{2P}$   | 54,000   |
| S. America  | Model IA   |          | Model II   |          |
|             | Likelihood | –3855.28 | Likelihood | –8044.71 |
|             | $N_C$      | 78,000   | $N_C$      | 150,000  |
|             | $N_1$      | 75,660   | $N_1$      | 96,000   |
|             | $N_2$      | 2,340    | $N_2$      | 54,000   |
|             | $N_{2P}$   | 205,920  | $N_3$      | 51,300   |
|             |            |          | $N_4$      | 2,700    |
|             |            |          | $N_{4P}$   | 145,800  |

than about  $6\sigma\sqrt{m}$  kilometers away from  $m$  generations ago in a part of the genome that is neutral in the lowlands; with  $m = 4000$  and  $\sigma = 3.5\text{km}$  this is 1,328km.

## Results

### Samples and data

We sampled 94 maize landraces from four distinct regions in the Americas (Table S1): the lowlands of Mesoamerica (Mexico/Guatemala;  $n = 24$ ) and northern S. America ( $n = 23$ ) and the highlands of Mesoamerica ( $n = 24$ ) and the Andes ( $n = 23$ ). Samples were genotyped using the MaizeSNP50 Beadchip platform (“MaizeSNP50”;  $n = 94$ ) and genotyping-by-sequencing (“GBS”;  $n = 87$ ). After filtering for Hardy-Weinberg genotype frequencies and minimum sample size at least 10 in each of the four populations (see Materials and Methods) 91,779 SNPs remained, including 67,828 and 23,951 SNPs from GBS and MaizeSNP50 respectively.

### Population structure

We performed a STRUCTURE analysis (Pritchard *et al.* 2000; Falush *et al.* 2003) of our landrace samples, varying the number of groups from  $K = 2$  to 6 (Figure 1, Figure S3). Most lan-

draces were assigned to groups consistent with *a priori* population definitions, but admixture between highland and lowland populations was evident at intermediate elevations ( $\sim 1700\text{m}$ ). Consistent with previously described scenarios for maize diffusion (Piperno 2006), we find evidence of shared ancestry between lowland Mesoamerican maize and both Mesoamerican highland and S. American lowland populations. Pairwise  $F_{ST}$  among populations reveals low overall differentiation (Table 1), and the higher  $F_{ST}$  values observed in S. America are consistent with the decreased admixture seen in STRUCTURE. Archaeological evidence supports a more recent colonization of the highlands in S. America (Piperno 2006; Perry *et al.* 2006; Grobman *et al.* 2012), suggesting that the observed differentiation may be the result of a stronger bottleneck during colonization of the S. American highlands.

### Population differentiation

To provide a null expectation for allele frequency differentiation, we used the joint site frequency distribution (JFD) of lowland and highland populations to estimate parameters of two demographic models using the maximum likelihood method implemented in *δaδi* (Gutenkunst *et al.* 2009). All models incorporate a domestication bottleneck (Wright *et al.* 2005) and population differentiation between lowland and highland populations, but differ in their consideration of admixture and ascertainment bias (Figure 2; see Materials and Methods for details).

Estimated parameter values are listed in Figure 2 and Table 2; while the observed and expected JFDs were quite similar for both models, residuals indicated an excess of rare variants in the observed JFDs in all cases (Figure 3). Under both models IA and IB, we found expansion in the highland population in Mesoamerica to be unlikely, but a strong bottleneck followed by population expansion is supported in S. American highland maize in both models IA and II. The likelihood value of model IB was higher than the likelihood of model IA by 850 units of log-likelihood (Table 2), consistent with analyses suggesting that introgression from *mexicana* played a significant role during the spread of maize into the Mesoamerican highlands (Hufford *et al.* 2013).

In addition to the parameters listed in Figure 2, we investigated the impact of varying the domestication bottleneck size ( $N_B$ ). Surprisingly,  $N_B$  was estimated to be equal to  $N_C$ , the population size at the end of the bottleneck, and the likelihood of  $N_B < N_C$  was much smaller than for alternative parameterizations (Table 2 and Table S2).

Comparisons of our empirical  $F_{ST}$  values to the null expectation simulated under our demographic models allowed us to identify significantly differentiated SNPs between lowland and highland populations. In all cases, observed  $F_{ST}$  values were quite similar to those generated under our null models (Figure S4), and model choice – including the parameterization of the domestication bottleneck – had little impact on the distribution of estimated  $P$ -values (Figure S5). We show re-

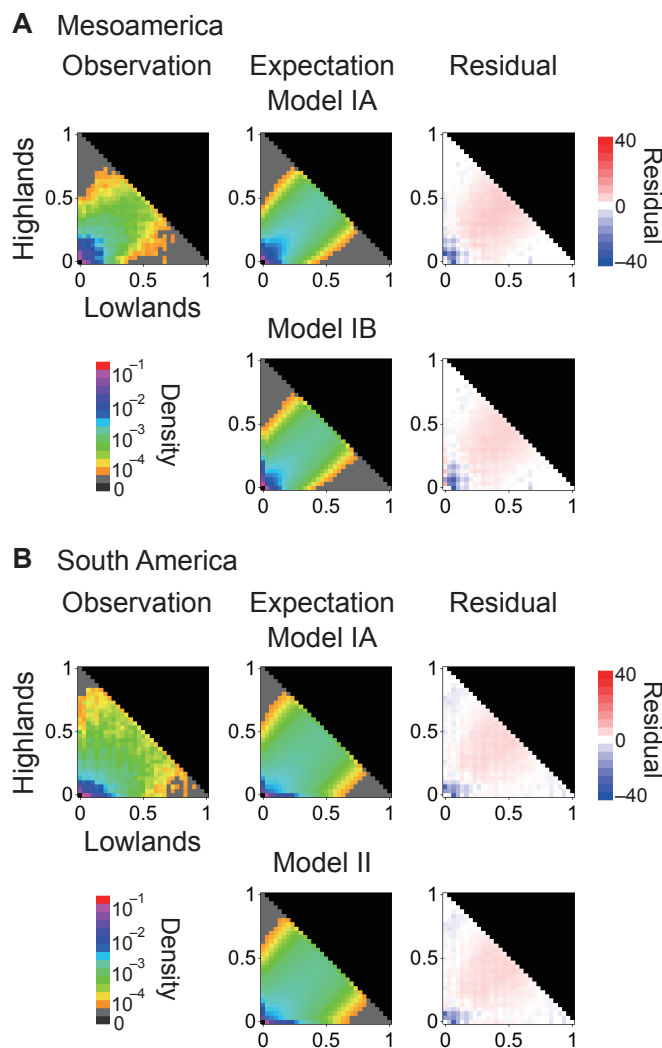

**Figure 3** Observed and expected joint distributions of minor allele frequencies in lowland and highland populations in (A) Mesoamerica and (B) S. America. Residuals are calculated as  $(\text{model} - \text{data})/\sqrt{\text{model}}$

results under Model IB for Mesoamerican populations and Model II for S. American populations. We chose  $P < 0.01$  as an arbitrary cut-off for significant differentiation between lowland and highland populations, and identified 687 SNPs in Mesoamerica ( $687/76,989=0.89\%$ ) and 409 SNPs in S. America ( $409/63,160=0.65\%$ ) as significant outliers (Figure 4). Different cutoff values (0.05, 0.001) gave qualitatively identical results (data not shown). SNPs with significant  $F_{ST}$   $P$ -values were enriched in intergenic regions rather than protein coding regions (60.0% vs. 47.9%, Fisher's Exact Test  $P < 10^{-7}$  for Mesoamerica; 62.0% vs. 47.8%, FET  $P < 10^{-5}$  for S. America). Different cutoff values (0.05, 0.001) gave qualitatively identical results (data not shown).

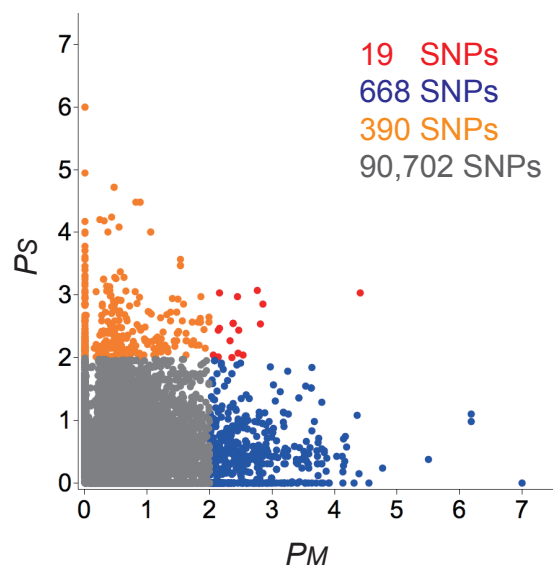

**Figure 4** Scatter plot of  $-\log_{10} P$ -values of observed  $F_{ST}$  values based on simulation from estimated demographic models.  $P$ -values are shown for each SNP in both Mesoamerica (Model IB;  $P_M$  on  $x$ -axis) and S. America (Model II;  $P_S$  on  $y$ -axis). Red, blue, orange and gray dots represents SNPs showing significance in both Mesoamerica and S. America, only in Mesoamerica, only in S. America, or in neither region, respectively (see text for details). The number of SNPs in each category is shown in the same color as the points.

### Patterns of adaptation

Given the historical spread of maize from an origin in the lowlands, it is tempting to assume that the observation of significant population differentiation at a SNP should be primarily due to an increase in frequency of adaptive alleles in the highlands. To test this hypothesis, we sought to identify the adaptive allele at each locus using comparisons between Mesoamerica and S. America as well as to *parviglumis*. Alleles were called ancestral if they were at higher frequency in *parviglumis*, or uncalled in *parviglumis* but at higher frequency in all populations but one. SNPs were consistent with Mesoamerica-specific adaptation if one allele was at high frequency in one Mesoamerican population, low frequency in the other Mesoamerican population, and either: low frequency in *parviglumis* and at most intermediate frequency in S. American populations, or missing in *parviglumis* and at low frequency in S. American populations. On the other hand, SNPs were consistent with adaptation to highlands in both regions if they were at high frequency in both highland populations, and at low frequency in the lowland populations and *parviglumis*; and vice-versa for adaptation to lowlands in both regions. SNPs with an allele at high frequency in one highland and the alternate lowland population are suggestive of adaptation in both populations but on different haplotypes created by recombination.

Consistent with predictions, we infer that differentiation at



72.3% (264) and 76.7% (230) of SNPs in Mesoamerica and S. America is due to adaptation in the highlands after excluding SNPs with ambiguous patterns likely due to recombination. The majority of these SNPs show patterns of haplotype variation (by the PHS test) consistent with our inference of selection (Table S3 and Supporting Information, File S1).

Convergent evolution at the nucleotide level should be reflected in an excess of SNPs showing significant differentiation between lowland and highland populations in both Mesoamerica and S. America. Although the 19 SNPs showing  $F_{ST}$   $P$ -values  $< 0.01$  in both Mesoamerica ( $P_M$ ) and S. America ( $P_S$ ) is statistically greater than the  $\approx 5$  expected ( $48,370 \times 0.01 \times 0.01 \approx 4.8$ ;  $\chi^2$ -test,  $P \ll 0.001$ ), it nonetheless represents a small fraction ( $\approx 7 - 8\%$ ) of all SNPs showing evidence of selection. This paucity of shared selected SNPs does not appear to be due to our demographic model: a simple outlier approach based using the 1% highest  $F_{ST}$  values finds no shared adaptive SNPs between Mesoamerican and S. American highland populations. For 13 of 19 SNPs showing putative evidence of shared selection we could use data from *parviglumis* to infer whether these SNPs were likely selected in lowland or highland conditions (Supporting Information, File S1). Surprisingly, SNPs identified as shared adaptive variants more frequently showed segregation patterns consistent with lowland (10 SNPs) rather than highland adaptation (2 SNPs).

We also investigated how often different SNPs in the same gene may have been targeted by selection. To search for this pattern, we considered all SNPs within 10kb of a transcript as part of the same gene, though SNPs in an miRNA or second transcript within 10kb of the transcript of interest were excluded. We classified SNPs showing significant  $F_{ST}$  in Mesoamerica, S. America or in both regions into 778 genes. Of these, 485 and 277 genes showed Mesoamerica-specific and SA-specific significant SNPs, while 14 genes contained at least one SNP with a pattern of differentiation suggesting convergent evolution and 2 genes contained both Mesoamerica-specific and SA-specific significant SNPs. Overall, however, fewer genes showed evidence of convergent evolution than expected by chance (permutation test;  $P < 10^{-5}$ ). Despite similar phenotypes and environments, we thus see little evidence for convergent evolution at either the SNP or the gene level.

### Comparison to theory

Given the limited empirical evidence for convergent evolution at the molecular level, we took advantage of recent theoretical efforts (Ralph and Coop 2014) to assess the degree of convergence expected under a spatially explicit population genetic model (see Materials and Methods). Our modeling estimates assume a maize population density  $\rho$  of the highlands to be around  $(0.5 \text{ ha field/person}) \times (0.5 \text{ people/km}^2) \times (2 \times 10^4 \text{ plants per ha field}) = 5,000 \text{ plants per km}^2$ . The area of the Andean highlands currently under maize cultivation is estimated to be approximately  $A = 8400 \text{ km}^2$ , giving a total maize popu-

lation of  $A\rho = 4.2 \times 10^7$ . Assuming an offspring variance of  $\xi^2 = 30$ , we can then compute the waiting time  $T_{\text{mut}} = 1/\lambda_{\text{mut}}$  for a new beneficial mutation to appear and fix. We observe that even if there is relatively strong selection for an allele at high elevation ( $s_b = 0.01$ ), a single-base mutation with mutation rate  $\mu = 10^{-8}$  would take an expected 3,571 generations to appear and fix. Our estimate of the maize population size uses the land area currently under cultivation and is likely an overestimate;  $T_{\text{mut}}$  scales linearly with the population size and lower estimates of  $A$  will thus increase  $T_{\text{mut}}$  proportionally. However, because  $T_{\text{mut}}$  also scales approximately linearly with both the selection coefficient and the mutation rate, strong selection and the existence of multiple equivalent mutable sites could reduce this time. For example, if any one of 10 sites within a gene could have equivalent strong selective benefit ( $s_b = 0.1$ ),  $T_{\text{mut}}$  would be reduced to 36 generations assuming constant  $A$  over time.

Gene flow between highland regions could also generate patterns of shared adaptive SNPs. From our demographic model we have estimated a mean dispersal distance of  $\sigma \approx 1.8$  kilometers per generation. With selection against the highland allele in low elevations  $10^{-1} \geq s_m \geq 10^{-4}$ , the distance  $\sigma/\sqrt{2s_m}$  over which the frequency of a highland-adaptive, lowland-deleterious allele decays into the lowlands is still short: between 7 and 250 kilometers. Since the Mesoamerican and Andean highlands are around 4,000 km apart, the time needed for a rare allele with weak selective cost  $s_m = 10^{-4}$  in the lowlands to transit between the two highland regions is  $T_{\text{mig}} \approx 8 \times 10^4$  generations. While the exponential dependence on distance in equation (4) means that shorter distances could be transited more quickly, the waiting time  $T_{\text{mig}}$  is also strongly dependent on the magnitude of the deleterious selection coefficient: with  $s_m = 10^{-4}$ ,  $T_{\text{mig}} \approx 25$  generations over a distance of 2,000 km, but increases to  $\approx 10^8$  generations with a still weak selective cost of  $s_m = 10^{-3}$ .

However, the rough calculations with coalescent theory above show that even neutral alleles are not expected to transit between the Mesoamerican and Andean highlands within 4,000 generations. This puts a lower bound on the time for deleterious alleles to transit as well, suggesting that we should not expect even weakly deleterious alleles (e.g.  $s_m = 10^{-4}$ ) to have moved between highlands.

Taken together, these theoretical considerations suggest that any alleles beneficial in the highlands that are neutral or deleterious in the lowlands that are shared by both the Mesoamerican and S. American highlands would have been present as standing variation in both populations, rather than passed between them.

### Alternative routes of adaptation

The lack of both empirical and theoretical support for convergent adaptation at SNPs or genes led us to investigate alternative patterns of adaptation.

We first sought to understand whether SNPs showing high differentiation between the lowlands and the highlands arose primarily via new mutations or were selected from standing genetic variation. We found that putatively adaptive variants identified in both Mesoamerica and S. America tended to segregate in the lowland population more often than other SNPs of similar mean allele frequency (85.3% vs. 74.8% in Mesoamerica (Fisher's exact test  $P < 10^{-9}$  and 94.8% vs 87.4% in S. America,  $P < 10^{-4}$ ). We extended this analysis by retrieving SNP data from 14 *parviglumis* inbred lines included in the Hapmap v2 data set, using only SNPs with  $n \geq 10$  (Chia *et al.* 2012; Hufford *et al.* 2012b). Again we found that putatively adaptive variants were more likely to be polymorphic in *parviglumis* (78.3% vs. 72.2% in Mesoamerica (Fisher's exact test  $P < 0.01$  and 80.2% vs 72.8% in S. America,  $P < 0.01$ ).

While maize in highland Mesoamerica grows in sympatry with the highland teosinte *mexicana*, maize in S. America is outside the range of wild *Zea* species, leading to a marked difference in the potential for adaptive introgression from wild relatives. Pyhäjärvi *et al.* (2013) recently investigated local adaptation in *parviglumis* and *mexicana* populations, characterizing differentiation between these subspecies using an outlier approach. Genome-wide, only a small proportion (2–7%) of our putatively adaptive SNPs were identified by Pyhäjärvi *et al.* (2013), though these numbers are still in excess of expectations (Fisher's exact test  $P < 10^{-3}$  for S. America and  $P < 10^{-8}$  for Mesoamerica; Table S4). The proportion of putatively adaptive SNPs shared with teosinte was twice as high in Mesoamerica, however, leading us to evaluate the contribution of introgression from *mexicana* (Hufford *et al.* 2013) in patterning differences between S. American and Mesoamerican highlands.

The proportion of putatively adaptive SNPs in introgressed regions of the genome in highland maize in Mesoamerica was nearly four times higher than found in S. America (FET  $P < 10^{-11}$ ), while differences outside introgressed regions were much smaller (7.5% vs. 6.2%; Table S5). Furthermore, of the 77 regions identified as introgressed in Hufford *et al.* (2013), more than twice as many contain at least one  $F_{ST}$  outlier in Mesoamerica as in S. America (23 compared to 9, one-tailed Z-test  $P = 0.0027$ ). Excluding putatively adaptive SNPs, mean  $F_{ST}$  between Mesoamerica and S. America is only slightly higher in introgressed regions (0.032) than across the rest of the genome (0.020), suggesting the enrichment of high  $F_{ST}$  SNPs seen in Mesoamerica is not simply due to neutral introgression of a divergent teosinte haplotype.

## Discussion

Our analysis of diversity and population structure in maize landraces from Mesoamerica and S. America points to an independent origin of S. American highland maize, in line with earlier archaeological (Piperno 2006; Perry *et al.* 2006; Grobman *et al.* 2012) and genetic (van Heerwaarden *et al.* 2011) work. We

use our genetic data to fit a model of historical population size change, and find no evidence of a bottleneck in Mesoamerica but a strong bottleneck followed by expansion in the highlands of S. America. Surprisingly, our models showed no support for a maize domestication bottleneck, apparently contradicting earlier work (Eyre-Walker *et al.* 1998; Tenaillon *et al.* 2004; Wright *et al.* 2005). One factor contributing to these differences is the set of loci sampled. Previous efforts focused on data exclusively from protein-coding regions, while our data set includes a large number of noncoding variants. Diversity differences between maize and teosinte are greatest in protein-coding regions (Hufford *et al.* 2012b), presumably due to the effects of background selection (Charlesworth *et al.* 1993), and demographic estimates using only protein-coding loci should thus overestimate the strength of a domestication bottleneck. While a more detailed comparison with data from teosinte will be required to validate these results, they nonetheless suggest the value of a reassessment of the combined impacts of demography and selection on genome-wide patterns of diversity during maize domestication.

We identified SNPs deviating from patterns of allele frequencies determined by our demographic model as loci putatively under selection for highland adaptation. These conclusions are supported by evidence of haplotype differentiation (Table S3) and the directionality of allele frequency change (Supporting Information, File S1). Consistent with results from both GWAS (Wallace *et al.* 2014) and local adaptation in teosinte (Pyhäjärvi *et al.* 2013), we find that putatively adaptive SNPs are enriched in intergenic regions of the genome, further suggesting an important role for regulatory variation in maize evolution.

Although our data identify hundreds of loci that may have been targeted by natural selection in Mesoamerica and S. America, fewer than 1.8% of SNPs and 2.1% of genes show evidence for convergent evolution between the two highland populations. This relative lack of convergent evolution is concordant with recently developed theory (Ralph and Coop 2014), which applied to this system suggests that convergent evolution involving identical nucleotide changes is quite unlikely to have occurred in the time since domestication through either recurrent mutation or migration across Central America via seed sharing. These results are generally robust to variation in most of the parameters, but are sensitive to gross misestimation of some of the parameters – for example if seed sharing was common over distances of hundreds of kilometers. The modeling highlights that our outlier approach may not detect traits undergoing convergent evolution if the genetic architecture of the trait is such that mutation at a large number of nucleotides would have equivalent effects on fitness (i.e. adaptive traits have a large mutational target). While QTL analysis suggests that some of the traits suggested to be adaptive in highland conditions may be determined by only a few loci (Lauter *et al.* 2004), others such as flowering time (Buckler *et al.* 2009) are likely to be the result of a large number of loci, each with small and perhaps similar effects on phenotype. Future quantitative

genetic analysis of highland traits using genome-wide association methods may prove useful in searching for the signal of selection on such highly quantitative traits.

Our observation of little convergent evolution is also consistent with the possibility that much of the adaptation to highland environments made use of standing genetic variation in lowland populations. Indeed, we find that as much as 90% of the putatively adaptive variants in Mesoamerica and S. America are segregating in lowland populations, and the vast majority are also segregating in teosinte. Selection from standing variation should be common when the scaled mutation rate  $\Theta$  (product of the effective population size, mutation rate and target size) is greater than 1, as long as the scaled selection coefficient  $Ns$  (product of the effective population size and selection coefficient) is reasonably large (Hermisson and Pennings 2005). Estimates of  $\theta$  from synonymous nucleotide diversity in maize are around 0.014, (Tenailon *et al.* 2004; Wright *et al.* 2005; Ross-Ibarra *et al.* 2009), suggesting that adaptation from standing genetic variation may be likely for target sizes larger than a few hundred nucleotides. In maize, such a scenario has been recently shown for the locus *grassy tillers1* (Wills *et al.* 2013), at which adaptive variants in both an upstream control region and the 3' UTR are segregating in teosinte but show evidence of recent selection in maize, presumably due to the effects of this locus on branching and ear number.

Finally, although we evaluated a genome-wide sample of more than 90,000 SNPs, this sampling is likely insufficient to capture all of the signals of selection across the genome. Linkage disequilibrium in maize decays rapidly (Chia *et al.* 2012), reaching a plateau in only a few hundred bp (Figure S6) and a much greater density of SNPs would be needed to effectively identify the majority of selective sweeps in the history of these populations (Tiffin and Ross-Ibarra 2014). SNP density alone does not explain the lack of convergent evolution seen at SNPs showing evidence of selection, however. Our genomic sampling may have thus identified only a subset of all loci targeted by natural selection, but there is no reason to believe that the percentage of selected loci showing convergent selection should change with higher genotyping density.

## Acknowledgements

We appreciate the helpful comments of P. Morrell and members of the Ross-Ibarra lab and Coop lab. This project was supported by Agriculture and Food Research Initiative Competitive Grant 2009-01864 from the USDA National Institute of Food and Agriculture and funding from the National Science Foundation, grants IOS-1238014 (to JRI) and DBI-1262645 (to PLR).

## Literature Cited

Alkorta-Aranburu, G., C. M. Beall, D. B. Witonsky, A. Gebremedhin, J. K. Pritchard, *et al.*, 2012 The genetic ar-

chitecture of adaptations to high altitude in Ethiopia. *PLoS Genet.* 8: e1003110.

Arendt, J., and D. Reznick, 2008 Convergence and parallelism reconsidered: what have we learned about the genetics of adaptation? *Trends Ecol. Evol.* 23: 26–32.

Barton, N. H., 1987 The probability of establishment of an advantageous mutant in a subdivided population. *Genet. Res.* 50: 35–40.

Berman, S. M., 1964 Limit theorems for the maximum term in stationary sequences. *Ann. Math. Statist.* 35: 502–516.

Bigham, A., M. Bauchet, D. Pinto, X. Mao, J. M. Akey, *et al.*, 2010 Identifying signatures of natural selection in Tibetan and Andean populations using dense genome scan data. *PLoS Genet.* 6: e1001116.

Brewbaker, J. L., 2014 Diversity and genetics of tassel branch numbers in maize. *Crop Science.*

Buckler, E. S., J. B. Holland, P. J. Bradbury, C. B. Acharya, P. J. Brown, *et al.*, 2009 The genetic architecture of maize flowering time. *Science* 325: 714–718.

Casati, P., and V. Walbot, 2005 Differential accumulation of maysin and rhamnosylisoorientin in leaves of high-altitude landraces of maize after UV-B exposure. *Plant, Cell & Environment* 28: 788–799.

Charlesworth, B., M. T. Morgan and D. Charlesworth, 1993 The effect of deleterious mutations on neutral molecular variation. *Genetics* 134: 1289–1303.

Chia, J. M., C. Song, P. J. Bradbury, D. Costich, N. de Leon, *et al.*, 2012 Maize HapMap2 identifies extant variation from a genome in flux. *Nat. Genet.* 44: 803–807.

Clark, R. M., S. Tavaré and J. Doebley, 2005 Estimating a nucleotide substitution rate for maize from polymorphism at a major domestication locus. *Mol. Biol. Evol.* 22: 2304–2312.

Colosimo, P. F., K. E. Hosemann, S. Balabhadra, G. Villarreal Jr., M. Dickson, *et al.*, 2005 Widespread parallel evolution in sticklebacks by repeated fixation of *Ectodysplasin* alleles. *Science* 307: 1928–1933.

Currat, M., G. Trabuchet, D. Rees, P. Perrin, R. M. Harding, *et al.*, 2002 Molecular analysis of the  $\beta$ -globin gene cluster in the Niokholo Mandenka population reveals a recent origin of the  $\beta^s$  senegal mutation. *Am. J. Hum. Genet.* 70: 207–223.

Elmer, K. R., and A. Meyer, 2011 Adaptation in the age of ecological genomics: insights from parallelism and convergence. *Trends Ecol. Evol.* 26: 298–306.

- Elshire, R. J., J. C. Glaubitz, Q. Sun, J. A. Poland, K. Kawamoto, *et al.*, 2011 A robust, simple genotyping-by-sequencing (GBS) approach for high diversity species. *PLoS ONE* 6: e19379.
- Eyre-Walker, A., R. L. Gaut, H. Hilton, D. L. Feldman and B. S. Gaut, 1998 Investigation of the bottleneck leading to the domestication of maize. *Proc. Natl. Acad. Sci. USA* 95: 4441–4446.
- Falush, D., M. Stephens and J. K. Pritchard, 2003 Inference of population structure using multilocus genotype data: linked loci and correlated allele frequencies. *Genetics* 164: 1567–1587.
- Fang, Z., T. Pyhäjärvi, A. L. Weber, R. K. Dawe, J. C. Glaubitz, *et al.*, 2012 Megabase-scale inversion polymorphism in the wild ancestor of maize. *Genetics* 191: 883–894.
- Ganal, M. W., G. Durstewitz, A. Polley, A. Bérard, E. S. Buckler, *et al.*, 2011 A large maize (*Zea mays* L.) SNP genotyping array: development and germplasm genotyping, and genetic mapping to compare with the B73 reference genome. *PLoS One* 6: e28334.
- Geiger, J., 1999 Elementary new proofs of classical limit theorems for Galton-Watson processes. *Journal of Applied Probability* 36: pp. 301–309.
- Glaubitz, J. C., T. M. Casstevens, F. Lu, J. Harriman, R. J. Elshire, *et al.*, 2014 TASSEL-GBS: A high capacity genotyping by sequencing analysis pipeline. *PLoS ONE* 9: e90346.
- Gore, M. A., J. M. Chia, R. J. Elshire, Q. Sun, E. S. Ersoz, *et al.*, 2009 A first-generation haplotype map of maize. *Science* 326: 1115–1117.
- Grobman, A., D. Bonavia, T. D. Dillehay, D. R. Piperno, J. Iriarte, *et al.*, 2012 Pre-ceramic maize from Paredones and Huaca Prieta, Peru. *Proc. Natl. Acad. Sci. USA* 109: 1755–1759.
- Gutenkunst, R. N., R. D. Hernandez, S. H. Williamson and C. D. Bustamante, 2009 Inferring the joint demographic history of multiple populations from multidimensional SNP frequency data. *PLoS Genet.* 5: e1000695.
- Haldane, J. B. S., 1948 The theory of a cline. *J. Genet.* 48: 277–284.
- Hermitson, J., and P. S. Pennings, 2005 Soft sweeps: molecular population genetics of adaptation from standing genetic variation. *Genetics* 169: 2335–2352.
- Hudson, R. R., 2002 Generating samples under a Wright-Fisher neutral model of genetic variation. *Bioinformatics* 18: 337–338.
- Huerta-Sánchez, E., X. Jin, Z. Bianba, B. M. Peter, N. Vinckenbosch, *et al.*, 2014 Altitude adaptation in Tibetans caused by introgression of Denisovan-like DNA. *Nature* 512: 194–197.
- Hufford, M. B., P. Lubinsky, T. Pyhäjärvi, M. T. Devengeno, N. C. Ellstrand, *et al.*, 2013 The genomic signature of crop-wild introgression in maize. *PLoS Genet.* 9: e1003477.
- Hufford, M. B., E. Martinez-Meyer, B. S. Gaut, L. E. Eguiarte and M. I. Tenailon, 2012a Past and present distributions of wild and domesticated *Zea mays*: a chance to revisit maize history. *PLoS One* 7: e47659.
- Hufford, M. B., X. Xu, J. van Heerwaarden, T. Pyhäjärvi, J. M. Chia, *et al.*, 2012b Comparative population genomics of maize domestication and improvement. *Nat. Genet.* 44: 808–811.
- Jagers, P., 1975 *Branching processes with biological applications*. Wiley-Interscience [John Wiley & Sons], London Wiley Series in Probability and Mathematical Statistics—Applied Probability and Statistics.
- Körner, C., 2007 The use of ‘altitude’ in ecological research. *Trends Ecol. Evol.* 22: 569–574.
- Kovach, M. J., M. N. Calingacion, M. A. Fitzgerald and S. R. McCouch, 2009 The origin and evolution of fragrance in rice (*Oryza sativa* L.). *Proc. Natl. Acad. Sci. USA* 106: 14444–14449.
- Kwiatkowski, D. P., 2005 How malaria has affected the human genome and what human genetics can teach us about malaria. *Am. J. Hum. Genet.* 77: 171–192.
- Lauter, N., C. Gustus, A. Westerbergh and J. Doebley, 2004 The inheritance and evolution of leaf pigmentation and pubescence in teosinte. *Genetics* 167: 1949–1959.
- Matsuoka, Y., Y. Vigouroux, M. M. Goodman, J. Sanchez G, E. Buckler, *et al.*, 2002 A single domestication for maize shown by multilocus microsatellite genotyping. *Proc. Natl. Acad. Sci. USA* 99: 6080–6084.
- Mercer, K., A. Martínez-Vásquez and H. R. Perales, 2008 Asymmetrical local adaptation of maize landraces along an altitudinal gradient. *Evolutionary Applications* 1: 489–500.
- Perry, L., D. H. Sandweiss, D. R. Piperno, K. Rademaker, M. A. Malpass, *et al.*, 2006 Early maize agriculture and interzonal interaction in southern Peru. *Nature* 440: 76–79.
- Piperno, D. R., 2006 Quaternary environmental history and agricultural impact on vegetation in Central America. *Annals of the Missouri Botanical Garden* 93: 274–296.

- Piperno, D. R., A. J. Ranere, I. Holst, J. Iriarte and R. Dickau, 2009 Starch grain and phytolith evidence for early ninth millennium B.P. maize from the Central Balsas River Valley, Mexico. *Proc. Natl. Acad. Sci. USA* 106: 5019–5024.
- Pritchard, J. K., M. Stephens and P. Donnelly, 2000 Inference of population structure using multilocus genotype data. *Genetics* 155: 945–959.
- Pyhäjärvi, T., M. B. Hufford, S. Mezmouk and J. Ross-Ibarra, 2013 Complex patterns of local adaptation in teosinte. *Genome Biol. Evol.* 5: 1594–1609.
- Ralph, P. L., and G. Coop, 2014 Convergent evolution during local adaptation to patchy landscapes. *bioRxiv* p. 006940.
- Ross-Ibarra, J., M. Tenailon and B. S. Gaut, 2009 Historical divergence and gene flow in the genus *Zea*. *Genetics* 181: 1399–1413.
- Saghai-Marooif, M. A., K. M. Soliman, R. A. Jorgensen and R. W. Allard, 1984 Ribosomal DNA spacer-length polymorphisms in barley - Mendelian inheritance, chromosomal location, and population-dynamics. *Proc. Natl. Acad. Sci. USA* 81: 8014–8018.
- Scheet, P., and M. Stephens, 2006 A fast and flexible statistical model for large-scale population genotype data: applications to inferring missing genotypes and haplotypic phase. *Am. J. Hum. Genet.* 78: 629–644.
- Scheinfeldt, L. B., S. Soi, S. Thompson, A. Ranciaro, D. Woldemeskel, *et al.*, 2012 Genetic adaptation to high altitude in the Ethiopian highlands. *Genome Biol.* 13: R1.
- Schnable, P. S., D. Ware, R. S. Fulton, J. C. Stein, F. Wei, *et al.*, 2009 The B73 maize genome: complexity, diversity, and dynamics. *Science* 326: 1112–1115.
- Slatkin, M., 1973 Gene flow and selection in a cline. *Genetics* 75: 733–756.
- Tenailon, M. I., M. C. Sawkins, A. D. Long, R. L. Gaut, J. F. Doebley, *et al.*, 2001 Patterns of DNA sequence polymorphism along chromosome 1 of maize (*Zea mays* ssp. *mays* L.). *Proc. Natl. Acad. Sci. USA* 98: 9161–9166.
- Tenailon, M. I., J. U'Ren, O. Tenailon and B. S. Gaut, 2004 Selection versus demography: a multilocus investigation of the domestication process in maize. *Mol. Biol. Evol.* 21: 1214–1225.
- Tiffin, P., and J. Ross-Ibarra, 2014 Advances and limits of using population genetics to understand local adaptation. *Trends Ecol. Evol.*
- Toomajian, C., T. T. Hu, M. J. Aranzana, C. Lister, C. Tang, *et al.*, 2006 A nonparametric test reveals selection for rapid flowering in the *Arabidopsis* genome. *PLoS Biol.* 4: e137.
- van Heerwaarden, J., J. Doebley, W. H. Briggs, J. C. Glaubitz, M. M. Goodman, *et al.*, 2011 Genetic signals of origin, spread, and introgression in a large sample of maize landraces. *Proc. Natl. Acad. Sci. USA* 108: 1088–1092.
- van Heerwaarden, J., F. A. van Eeuwijk and J. Ross-Ibarra, 2010 Genetic diversity in a crop metapopulation. *Heredity* 104: 28–39.
- Vigouroux, Y., J. C. Glaubitz, Y. Matsuoka, M. M. Goodman, D. Jesús Sánchez G, *et al.*, 2008 Population structure and genetic diversity of New World maize races assessed by DNA microsatellites. *Am. J. Bot.* 95: 1240–1253.
- Wakeley, J., 2005 *Coalescent Theory, an Introduction*. Roberts and Company, Greenwood Village, CO.
- Wallace, J. G., P. J. Bradbury, N. Zhang, Y. Gibon, M. Stitt, *et al.*, 2014 Association mapping across numerous traits reveals patterns of functional variation in maize. *PLoS Genet.* 10: e1004845.
- Wellhausen, E. J., A. O. Fuentes, A. H. Corzo and P. C. Mangelsdorf, 1957 *Races of Maize in Central America*. National Academy of Science, National Research Council, Washington, D. C.
- Wilkes, H. G., 1977 Hybridization of maize and teosinte, in Mexico and Guatemala and improvement of maize. *Eco. Bot.* 31: 254–293.
- Wills, D. M., C. J. Whipple, S. Takuno, L. E. Kursel, L. M. Shannon, *et al.*, 2013 From many, one: genetic control of prolificacy during maize domestication. *PLoS Genet.* 9: e1003604.
- Wood, T. E., J. M. Burke and L. H. Rieseberg, 2005 Parallel genotypic adaptation: when evolution repeats itself. *Genetica* 123: 157–170.
- Wright, S. I., I. V. Bi, S. G. Schroeder, M. Yamasaki, J. F. Doebley, *et al.*, 2005 The effects of artificial selection on the maize genome. *Science* 308: 1310–1314.

## Appendix

### Demographic modeling

Throughout we use in many ways the *branching process approximation* – if an allele is locally rare, then for at least a few generations, the fates of each offspring are nearly independent. So, if the allele is locally deleterious, the total numbers of that allele behave as a subcritical branching process, destined for ultimate extinction. On the other hand, if the allele is advantageous, it will either die out or become locally common, with its fate determined in the first few generations. If the number of offspring of an individual with this allele is the random variable  $X$ , with mean  $\mathbb{E}[X] = 1 + s$  (selective advantage  $s > 0$ ), variance  $\text{Var}[X] = \xi^2$ , and  $\mathbb{P}\{X = 0\} > 0$  (some chance of leaving no offspring), then the probability of local nonextinction  $p_*$  is approximately  $p_* \approx 2s/\xi^2$  to a second order in  $s$ . The precise value can be found by defining the generating function  $\Phi(u) = \mathbb{E}[u^X]$ ; the probability of local nonextinction  $p_*$  is the minimal solution to  $\Phi(1 - u) = 1 - u$ . (This can be seen because:  $1 - p_*$  is the probability that an individual’s family dies out; this is equal to the probability that the families of all that individual’s children die out; since each child’s family behaves independently, if the individual has  $x$  offspring, this is equal to  $(1 - p_*)^x$ ; and  $\Phi(1 - p_*) = \mathbb{E}[(1 - p_*)^X]$ .)

If the selective advantage ( $s$ ) depends on geographic location, a similar fact holds: index spatial location by  $i \in 1, \dots, n$ , and for  $u = (u_1, u_2, \dots, u_n)$  define the functions  $\Phi_i(u) = \mathbb{E}[\prod_j u_j^{X_{ij}}]$ , where  $X_{ij}$  is the (random) number of offspring that an individual at  $i$  produces at location  $j$ . Then  $p_* = (p_{*1}, \dots, p_{*n})$ , the vector of probabilities that a new mutation at each location eventually fixes, is the minimal solution to  $\Phi(1 - p_*) = 1 - p_*$ , i.e.  $\Phi_i(1 - p_*) = 1 - p_{*i}$ .

Here we consider a linear habitat, so that the selection coefficient at location  $\ell_i$  is  $s_i = \min(s_b, \max(-s_d, \alpha\ell_i))$ . There does not seem to be a nice analytic expression for  $p_*$  in this case, but since  $1 - p_*$  is a fixed point of  $\Phi$ , the solution can be found by iteration:  $1 - p_* = \lim_{n \rightarrow \infty} \Phi^n(u)$  for an appropriate starting point  $u$ .

### Maize model

The migration and reproduction dynamics we use are taken largely from van Heerwaarden *et al.* (2010). On a large scale, fields of  $N$  plants are replanted each year from  $N_f$  ears, either from completely new stock (with probability  $p_e$ ), from partially new stock (a proportion  $r_m$  with probability  $p_m$ ), or entirely from the same field. Plants have an average of  $\mu_E$  ears per plant, and ears have an average of  $N/N_f$  kernels; so a plant has on average  $\mu_E N/N_f$  kernels, and a field has on average  $\mu_E N$  ears and  $\mu_E N^2/N_f$  kernels. We suppose that a plant with the selected allele is pollen parent to  $(1 + s)\mu_E N/N_f$  kernels, and also seed parent to  $(1 + s)\mu_E N/N_f$  kernels, still in  $\mu_E$  ears. The number of offspring a plant has depends on how many of its offspring kernels get replanted. Some proportion  $m_g$  of the pollen-parent kernels are in other fields, and may be replanted; but with probability  $p_e$  no other kernels (i.e. those in the same field) are replanted. Otherwise, with probability  $1 - p_m$  the farmer chooses  $N_f$  of the ears from this field to replant (or,  $(1 - r_m)N_f$  of them, with probability  $p_m$ ); this results in a mean number  $N_f/N$  (or,  $(1 - r_m)N_f/N$ ) of the plant’s ears of seed children being chosen, and a mean number  $1 + s$  of the plant’s pollen children kernels being chosen. Furthermore, the field is used to completely (or partially) replant another’s field with chance  $p_e/(1 - p_e)$  (or  $p_m$ ); resulting in another  $N_f/N$  (or  $r_m N_f/N$ ) ears and  $1 + s$  (or  $r_m(1 + s)$ ) pollen children being replanted elsewhere. Here we have assumed that pollen is well-mixed within a field, and that the selected allele is locally rare. Finally, we must divide all these offspring numbers by 2, since we look at the offspring carrying a particular haplotype, not of the diploid plant’s genome.

The above gives mean values; to get a probability model we assume that every count is Poisson. In other words, we suppose that the number of pollen children is Poisson with random mean  $\lambda_P$ , and the number of seed children is a mixture of  $K$  independent Poissons with mean  $(1 + s)N/N_f$  each, where  $K$  is the random number of ears chosen to replant, which is itself Poisson with mean  $\mu_K$ . By Poisson additivity, the numbers of local and migrant offspring are Poisson, with means  $\lambda_P = \lambda_{PL} + \lambda_{PM}$  and  $\mu_K = \mu_{KL} + \mu_{KM}$  respectively. With probability  $p_e$ ,  $\lambda_{PM} = m_g(1 + s)$  and  $\mu_K = \lambda_{PL} = 0$ . Otherwise, with probability  $(1 - p_e)(1 - p_m)$ ,  $\mu_{KL} = N_f/N$  and  $\lambda_{PL} = (1 + s)(1 - m_g)$ ; and with probability  $(1 - p_e)p_m$ ,  $\mu_{KL} = (1 - r_m)N_f/N$  and  $\lambda_{PL} = (1 - r_m)(1 + s)(1 - m_g)$ . The migrant means are, with probability  $(1 - p_e)p_e/(1 - p_e) = p_e$ ,  $\mu_{KM} = N_f/N$  and  $\lambda_{PM} = 1 + s$ ; while with probability  $(1 - p_e)p_m$ ,  $\mu_{KM} = r_m N_f/N$  and  $\lambda_{PM} = (1 + s)(r_m(1 - m_g) + m_g)$ , and otherwise  $\mu_{KM} = 0$  and  $\lambda_{PM} = m_g(1 + s)$ .

|                                      |            |                      |
|--------------------------------------|------------|----------------------|
| complete seed stock replacement prob | $p_e$      | 0.068                |
| pollen migration rate                | $m_g$      | 0.0083               |
| number of plants per field           | $N$        | $10^5$               |
| number of ears used to replant       | $N_f$      | 561                  |
| mean ears per plant                  | $\mu_E$    | 3                    |
| partial stock replacement prob       | $p_m$      | 0.02                 |
| mean proportion stock replaced       | $r_m$      | 0.2                  |
| pollen migration distance            | $\sigma_p$ | 0 km                 |
| seed replacement distance            | $\sigma_s$ | 50 km                |
| distance between demes               | $a$        | 15 km                |
| width of altitudinal cline           | $w$        | 62km                 |
| deleterious selection coefficient    | $s_d$      | varies               |
| beneficial selection coefficient     | $s_b$      | varies               |
| slope of selection gradient          | $\alpha$   | $(s_d + s_b)/w$      |
| variance in offspring number         | $\xi^2$    | varies               |
| maize population density             | $\rho$     | $5 \times 10^3$      |
| area of highland habitat             | $A$        | 8400 km <sup>2</sup> |
| mean dispersal distance              | $\sigma$   | 1.8 km               |

**TABLE A1 Parameter estimates used in calculations, and other notation.**

### Math

The generating function of a Poisson with mean  $\lambda$  is  $\phi(u; \lambda) = \exp(\lambda(u - 1))$ , and the generating function of a Poisson( $\mu$ ) sum of Poisson( $\lambda$ ) values is  $\phi(\phi(u; \lambda); \mu)$ . Therefore, the generating function for the diploid process, ignoring spatial structure, is

$$\Phi(u) = p_e \phi(u; m_g(1 + s)) \quad (\text{A1})$$

$$\begin{aligned} & + \{(1 - p_e)(1 - p_m)\phi(u; (1 + s)(1 - m_g))\phi(\phi(u; (1 + s)N/N_f); N_f/N) \\ & \quad + (1 - p_e)p_m\phi(u; (1 + s)(1 - r_m)(1 - m_g))\phi(\phi(u; (1 + s)N/N_f); (1 - r_m)N_f/N)\} \\ & \times \{p_e/(1 - p_e)\phi(u; 1 + s)\phi(\phi(u; (1 + s)N_f/N); N_f/N) \\ & \quad + p_m\phi(u; (1 + s)(r_m(1 - p_e)(1 - m_g) + m_g)) \\ & \quad \times \phi(\phi(u; (1 + s)N/N_f); r_m N_f/N) \\ & \quad + (1 - p_e/(1 - p_e) - p_m)\phi(u; m_g(1 + s))\} \\ = & \phi(u; m_g(1 + s)) \left( p_e \right. \quad (\text{A2}) \\ & + \{(1 - p_e)(1 - p_m)\phi(u; (1 + s)(1 - m_g))\phi(\phi(u; (1 + s)N/N_f); N_f/N) \\ & \quad + (1 - p_e)p_m\phi(u; (1 + s)(1 - r_m)(1 - m_g))\phi(\phi(u; (1 + s)N/N_f); (1 - r_m)N_f/N)\} \\ & \times \{p_e/(1 - p_e)\phi(u; (1 + s)(1 - m_g))\phi(\phi(u; (1 + s)N_f/N); N_f/N) \\ & \quad + p_m\phi(u; (1 + s)r_m(1 - m_g)) \\ & \quad \times \phi(\phi(u; (1 + s)N/N_f); r_m N_f/N) \\ & \quad \left. + (1 - p_e/(1 - p_e) - p_m)\} \right) \end{aligned}$$

To get the generating function for a haploid, replace every instance of  $1 + s$  by  $(1 + s)/2$ .

As a quick check, the mean total number of offspring of a diploid is

$$(1 + s)(m_g + (1 - p_e)\{(1 - p_m)((1 - m_g) + 1) + p_m((1 - r_m)(1 - m_g) + (1 - r_m))\} \\ + \{p_e((1 - m_g) + 1) + p_m(1 - p_e)(r_m(1 - m_g) + r_m)\}) \quad (\text{A3})$$

$$= (1 + s)(m_g + (1 - p_e)(2 - m_g)(1 - p_m r_m) + (p_e(2 - m_g) + p_m r_m(1 - p_e)(2 - m_g))) \quad (\text{A4})$$

$$= (1 + s)(m_g + (2 - m_g)((1 - p_e)(1 - p_m r_m) + p_e + p_m r_m(1 - p_e))) \quad (\text{A5})$$

$$= (1 + s)(m_g + (2 - m_g)) \quad (\text{A6})$$

$$= 2(1 + s). \quad (\text{A7})$$

We show numerically later that the probability of establishment is very close to  $2s$  over the variance in reproductive number (as expected). It is possible to write down an expression for the variance, but the exact expression does not aid the intuition.

### Migration and spatial structure

To incorporate spatial structure, suppose that the locations  $\ell_k$  are arranged in a regular grid, so that  $\ell_k = ak$ . Recall that  $s_k$  is the selection coefficient at location  $k$ . If the total number of offspring produced by an individual at  $\ell_i$  is  $\text{Poisson}(\lambda_i)$ , with each offspring independently migrating to location  $j$  with probability  $m_{ij}$ , then the number of offspring at  $j$  is  $\text{Poisson}(m_{ij}\lambda_i)$ , and so the generating function is

$$\phi(u; \lambda, m) = \prod_j \exp(\lambda_i m_{ij} (u_j - 1)) \quad (\text{A8})$$

$$= \exp \left\{ \lambda_i \left( \left( \sum_j m_{ij} u_j \right) - 1 \right) \right\}. \quad (\text{A9})$$

We can then substitute this expression into equation (A1), with appropriate migration kernels for pollen and seed dispersal.

For migration, we need migration rates and migration distances for both wind-blown pollen and for farmer seed exchange. The rates are parameterized as above; we need the typical dispersal distances, however. One option is to say that the typical distance between villages is  $d_v$ , and that villages are discrete demes, so that pollen stays within the deme (pollen migration distance 0) and seed is exchanged with others from nearby villages; on average  $\sigma_s$  distance away in a random direction. The number of villages away the seed comes from could be geometric (including the possibility of coming from the same village).

#### 0.1 Dispersal distance

The dispersal distance – the mean distance between parent and offspring – is equal to the chance of inter-village movement multiplied by the mean distance moved. This is

$$\sigma = (p_e + (1 - p_e)p_m r_m) \sigma_s = 3.5864 \text{ km} \quad (\text{A10})$$

at the parameter values above.

Iterating the generating function above finds the probability of establishment as a function of distance along the cline. This is shown in figure A1. Note that the approximation  $2s$  divided by the variance in offspring number is quite close.

In the main text, we used a rough upper bound on the rate of migration that ignored correlations in migrants. As we show in Ralph and Coop (2014), the rate of adaptation by diffusive migration is more precisely

$$\lambda_{\text{mig}} = \frac{1}{2} \rho s_m \min(s_m, 2s_b/\xi^2) \exp \left( -\frac{\sqrt{2s_m} R}{\sigma} \right).$$

First note that for  $10^{-1} \leq s_m \leq 10^{-4}$ , the value  $1/\sqrt{2s_m}$  is between 2 and 70 – so the exponential decay of the chance of migration falls off on a scale of between 2 and 70 times the dispersal distance. Above we have estimated the dispersal distance to be  $\sigma \approx 3.5$  km, and far below the mean distance  $\sigma_s$  to the field that a farmer replants seed from, when this happens, which we have as  $\sigma_s = 50$  km. Taking  $\sigma = 3.5$  km, we have that  $7 \leq \sigma/\sqrt{2s_m} \leq 250$  km. A very conservative upper bound might be  $\sigma \leq \sigma_s/10$  (if farmers replaced 10% of their seed with long-distance seed every year). At this upper bound, we would have  $10 \leq \sigma/\sqrt{2s_m} \leq 350$  km, which is not very different. This makes the exponential term small since  $R$  is on the order of thousands of kilometers.

Taking  $\sigma = 3.5$  km, we then compute that if  $s_m = 10^{-4}$  (very weak selection in the lowlands), then for  $R = 1,000$  km, the migration rate is  $\lambda_{\text{mig}} \leq 10^{-5}$ , i.e. it would take on the order of 100,000 generations (years) to get a successful migrant only 1,000 km away, under this model of undirected, diffusive dispersal. For larger  $s_m$ , the migration rate is much smaller.



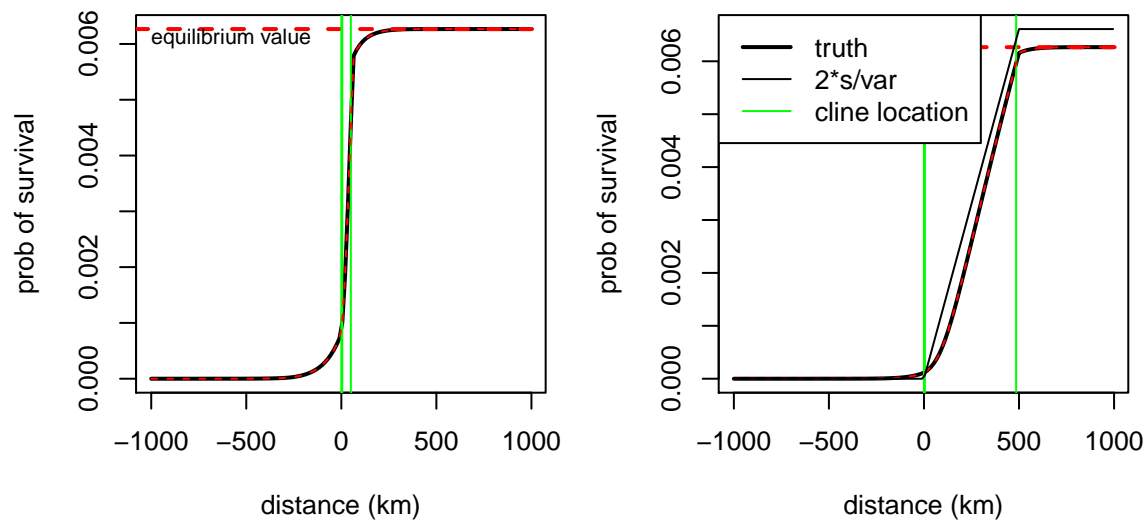

**FIGURE A1** Probability of establishment, as a function of distance along and around an altitudinal cline, whose boundaries are marked by the green lines. (A) The parameters above; with cline width 62km; (B) the same, except with cline width 500km.

**TABLE S1 List of maize landraces used in this study**

| ID <sup>a</sup>  | USDA ID         | Population   | Landrace                 | Locality                | Latitude | Longitude | Elevation | Origin  |
|------------------|-----------------|--------------|--------------------------|-------------------------|----------|-----------|-----------|---------|
| <b>RIMMA0409</b> | PI 478968       | Mesoamerican | Tepecintle               | Chiapas, Mexico         | 15.4     | -92.9     | 107       | USDA    |
| RIMMA0410        | PI 478970       | Lowland      | Vandeno                  | Chiapas, Mexico         | 15.4     | -92.9     | 107       | USDA    |
| <b>RIMMA0433</b> | PI 490825       |              | Nal Tel ATB              | Chiquimula, Guatemala   | 14.7     | -89.5     | 457       | USDA    |
| <b>RIMMA0441</b> | PI 515538       |              | Coscomatepec             | Veracruz, Mexico        | 19.2     | -97.0     | 1320      | USDA    |
| <b>RIMMA0615</b> | PI 628480       |              | Tuxpeno                  | Puebla, Mexico          | 20.1     | -97.2     | 152       | USDA    |
| <b>RIMMA0619</b> | PI 645772       |              | Pepitilla                | Guerrero, Mexico        | 18.4     | -99.5     | 747       | USDA    |
| <b>RIMMA0628</b> | PI 646017       |              | Tuxpeno Norteno          | Tamaulipas, Mexico      | 23.3     | -99.0     | 300       | USDA    |
| <b>RIMMA0696</b> | Ames 28568      |              | Tuxpeno                  | El Progreso, Guatemala  | 16.5     | -90.2     | 30        | Goodman |
| <b>RIMMA0700</b> | NSL 291626      |              | Olotillo                 | Chiapas, Mexico         | 16.8     | -93.2     | 579       | Goodman |
| <b>RIMMA0701</b> | PI 484808       |              | Olotillo                 | Chiapas, Mexico         | 16.6     | -92.7     | 686       | Goodman |
| <b>RIMMA0702</b> | Ames 28534      |              | Negro de Tierra Caliente | Sacatepequez, Guatemala | 14.5     | -90.8     | 1052      | Goodman |
| <b>RIMMA0703</b> | NSL 283390      |              | Nal Tel                  | Yucatan, Mexico         | 20.8     | -88.5     | 30        | Goodman |
| <b>RIMMA0709</b> | Ames 28452      |              | Tehua                    | Chiapas, Mexico         | 16.5     | -92.5     | 747       | Goodman |
| <b>RIMMA0710</b> | PI 478988       |              | Tepecintle               | Chiapas, Mexico         | 15.3     | -92.6     | 91        | Goodman |
| <b>RIMMA0712</b> | NSL 291696 CYMT |              | Oloton                   | Baja Verapaz, Guatemala | 15.3     | -90.3     | 1220      | Goodman |
| <b>RIMMA0716</b> | Ames 28459      |              | Zapalote Grande          | Chiapas, Mexico         | 15.3     | -92.7     | 91        | Goodman |
| <b>RIMMA0720</b> | PI 489372       |              | Negro de Tierra Caliente | Guatemala               | 15.5     | -88.9     | 39        | Goodman |
| <b>RIMMA0721</b> | Ames 28485      |              | Nal Tel ATB              | Chiquimula, Guatemala   | 14.6     | -90.1     | 915       | Goodman |
| <b>RIMMA0722</b> | Ames 28564      |              | Dzit Bacal               | Jutiapa, Guatemala      | 14.3     | -89.7     | 737       | Goodman |
| <b>RIMMA0727</b> | Ames 28555      |              | Comiteco                 | Guatemala               | 14.4     | -90.5     | 1151      | Goodman |
| <b>RIMMA0729</b> | PI 504090       |              | Tepecintle               | Guatemala               | 15.4     | -89.7     | 122       | Goodman |
| <b>RIMMA0730</b> | Ames 28517      |              | Quicheno Late            | Sacatepequez, Guatemala | 14.5     | -90.8     | 1067      | Goodman |
| <b>RIMMA0731</b> | PI 484137       |              | Bolita                   | Oaxaca, Mexico          | 16.8     | -96.7     | 1520      | Goodman |
| <b>RIMMA0733</b> | PI 479054       |              | Zapalote Chico           | Oaxaca, Mexico          | 16.6     | -94.6     | 107       | Goodman |
| <b>RIMMA0416</b> | PI 484428       | Mesoamerican | Cristalino de Chihuahua  | Chihuahua, Mexico       | 29.4     | -107.8    | 2140      | NA      |
| <b>RIMMA0417</b> | PI 484431       | Highland     | Azul                     | Chihuahua, Mexico       | 28.6     | -107.5    | 2040      | USDA    |
| <b>RIMMA0418</b> | PI 484476       |              | Gordo                    | Chihuahua, Mexico       | 28.6     | -107.5    | 2040      | USDA    |
| <b>RIMMA0421</b> | PI 484595       |              | Conico                   | Puebla, Mexico          | 19.9     | -98.0     | 2250      | USDA    |
| <b>RIMMA0422</b> | PI 485071       |              | Elotes Conicos           | Puebla, Mexico          | 19.1     | -98.3     | 2200      | USDA    |
| <b>RIMMA0423</b> | PI 485116       |              | Cristalino de Chihuahua  | Chihuahua, Mexico       | 29.2     | -108.1    | 2095      | NA      |
| <b>RIMMA0424</b> | PI 485120       |              | Apachito                 | Chihuahua, Mexico       | 28.0     | -107.6    | 2400      | USDA    |
| <b>RIMMA0425</b> | PI 485128       |              | Palomero Tipo Chihuahua  | Chihuahua, Mexico       | 26.8     | -107.1    | 2130      | USDA    |
| <b>RIMMA0614</b> | PI 628445       |              | Mountain Yellow          | Jalisco, Mexico         | 20.0     | -103.8    | 2060      | USDA    |
| <b>RIMMA0616</b> | PI 629202       |              | Zamorano Amarillo        | Jalisco, Mexico         | 20.8     | -102.8    | 1800      | USDA    |
| <b>RIMMA0620</b> | PI 645786       |              | Celaya                   | Guanajuato, Mexico      | 20.2     | -100.9    | 1799      | USDA    |
| <b>RIMMA0621</b> | PI 645804       |              | Zamorano Amarillo        | Guanajuato, Mexico      | 21.1     | -101.7    | 1870      | USDA    |
| <b>RIMMA0623</b> | PI 645841       |              | Palomero de Jalisco      | Jalisco, Mexico         | 20.0     | -103.7    | 2520      | USDA    |
| <b>RIMMA0625</b> | PI 645984       |              | Cacahuacintle            | Puebla, Mexico          | 19.0     | -97.4     | 2600      | USDA    |
| RIMMA0626        | PI 645993       |              | Arrocillo Amarillo       | Puebla, Mexico          | 19.9     | -97.6     | 2260      | USDA    |
| <b>RIMMA0630</b> | PI 646069       |              | Arrocillo Amarillo       | Veracruz, Mexico        | 19.8     | -97.3     | 2220      | USDA    |
| <b>RIMMA0670</b> | Ames 28508      |              | San Marceno              | San Marcos, Guatemala   | 15.0     | -91.8     | 2378      | Goodman |
| <b>RIMMA0671</b> | Ames 28538      |              | Salpor Tardio            | Solola, Guatemala       | 14.8     | -91.3     | 2477      | Goodman |
| <b>RIMMA0672</b> | PI 483613       |              | Chalqueno                | Mexico, Mexico          | 19.7     | -99.1     | 2256      | Goodman |
| <b>RIMMA0674</b> | PI 483617       |              | Toluca                   | Mexico, Mexico          | 19.3     | -99.7     | 2652      | Goodman |
| <b>RIMMA0677</b> | Ames 28476      |              | Conico Norteno           | Zacatecas, Mexico       | 21.4     | -102.9    | 1951      | Goodman |
| <b>RIMMA0680</b> | Ames 28448      |              | Tabloncillo              | Jalisco, Mexico         | 20.4     | -102.2    | 1890      | Goodman |
| <b>RIMMA0682</b> | PI 484571       |              | Tablilla de Ocho         | Jalisco, Mexico         | 22.1     | -103.2    | 1700      | Goodman |
| <b>RIMMA0687</b> | Ames 28473      |              | Conico Norteno           | Queretaro, Mexico       | 20.4     | -100.0    | 1921      | Goodman |

<sup>a</sup> GBS data are available for the accessions in bold font.

**TABLE S1 (continued)**

| ID               | USDA ID    | Population  | Landrace              | Locality                     | Latitude | Longitude | Elevation (m) | Origin  |
|------------------|------------|-------------|-----------------------|------------------------------|----------|-----------|---------------|---------|
| <b>RIMMA0388</b> | PI 443820  | S. American | Amagaceno             | Antioquia, Colombia          | 6.9      | -75.3     | 1500          | USDA    |
| <b>RIMMA0389</b> | PI 444005  | Lowland     | Costeno               | Atlantico, Colombia          | 10.4     | -74.9     | 7             | USDA    |
| <b>RIMMA0390</b> | PI 444254  |             | Comun                 | Caldas, Colombia             | 4.5      | -75.6     | 353           | USDA    |
| RIMMA0391        | PI 444296  |             | Andaqui               | Caqueta, Colombia            | 1.4      | -75.8     | 700           | USDA    |
| <b>RIMMA0392</b> | PI 444309  |             | Andaqui               | Caqueta, Colombia            | 1.8      | -75.6     | 555           | USDA    |
| <b>RIMMA0393</b> | PI 444473  |             | Costeno               | Cordoba, Colombia            | 8.3      | -75.2     | 100           | USDA    |
| <b>RIMMA0394</b> | PI 444621  |             | Pira                  | Cundinamarca, Colombia       | 4.8      | -74.7     | 1000          | USDA    |
| <b>RIMMA0395</b> | PI 444731  |             | Negrito               | Choco, Colombia              | 8.5      | -77.3     | 30            | USDA    |
| <b>RIMMA0396</b> | PI 444834  |             | Caqueteno             | Huila, Colombia              | 2.6      | -75.3     | 1100          | USDA    |
| <b>RIMMA0397</b> | PI 444897  |             | Negrito               | Magdalena, Colombia          | 11.6     | -72.9     | 50            | USDA    |
| <b>RIMMA0398</b> | PI 444923  |             | Puya                  | Magdalena, Colombia          | 9.4      | -75.7     | 27            | USDA    |
| <b>RIMMA0399</b> | PI 444954  |             | Cariaco               | Magdalena, Colombia          | 10.2     | -74.1     | 250           | USDA    |
| <b>RIMMA0403</b> | PI 445163  |             | Pira Naranja          | Narino, Colombia             | 1.3      | -77.5     | 1000          | USDA    |
| <b>RIMMA0404</b> | PI 445322  |             | Puya Grande           | Norte de Santander, Colombia | 7.3      | -72.5     | 1500          | USDA    |
| RIMMA0405        | PI 445355  |             | Puya                  | Norte de Santander, Colombia | 8.4      | -73.3     | 1100          | USDA    |
| <b>RIMMA0406</b> | PI 445514  |             | Yucatan               | Tolima, Colombia             | 5.0      | -74.9     | 450           | USDA    |
| RIMMA0407        | PI 445528  |             | Pira                  | Tolima, Colombia             | 4.2      | -74.9     | 450           | USDA    |
| <b>RIMMA0428</b> | PI 485354  |             | Aleman                | Huanuco, Peru                | -9.3     | -76.0     | 700           | NA      |
| <b>RIMMA0462</b> | PI 445073  |             | Amagaceno             | Narino, Colombia             | 1.6      | -77.2     | 1700          | USDA    |
| <b>RIMMA0690</b> | PI 444946  |             | Puya                  | Magdalena, Colombia          | 8.3      | -73.6     | 250           | Goodman |
| <b>RIMMA0691</b> | PI 445391  |             | Cacao                 | Santander, Colombia          | 6.6      | -73.1     | 1098          | NA      |
| <b>RIMMA0707</b> | PI 487930  |             | Tuxpeno               | Ecuador                      | -1.1     | -80.5     | 30            | Goodman |
| <b>RIMMA0708</b> | PI 488376  |             | Yunquillano F Andaqui | Ecuador                      | -3.5     | -78.6     | 1098          | Goodman |
| <b>RIMMA0426</b> | PI 485151  | S. American | Rabo de Zorro         | Ancash, Peru                 | -9.1     | -77.8     | 2500          | NA      |
| <b>RIMMA0430</b> | PI 485362  | Highland    | Sarco                 | Ancash, Peru                 | -9.2     | -77.7     | 2585          | NA      |
| <b>RIMMA0431</b> | PI 485363  |             | Perlilla              | Huanuco, Peru                | -8.7     | -77.1     | 2900          | NA      |
| <b>RIMMA0436</b> | PI 514723  |             | Morocho Cajabambino   | Amazonas, Peru               | -6.2     | -77.9     | 2200          | NA      |
| <b>RIMMA0437</b> | PI 514752  |             | Ancashino             | Ancash, Peru                 | -9.3     | -77.6     | 2688          | NA      |
| <b>RIMMA0438</b> | PI 514809  |             | Maranon               | Ancash, Peru                 | -8.7     | -77.4     | 2820          | NA      |
| RIMMA0439        | PI 514969  |             | Maranon               | La Libertad, Peru            | -8.5     | -77.2     | 2900          | NA      |
| <b>RIMMA0464</b> | PI 571438  |             | Chullpi               | Huancavelica, Peru           | -12.3    | -74.7     | 1800          | USDA    |
| <b>RIMMA0465</b> | PI 571457  |             | Huarmaca              | Piura, Peru                  | -5.6     | -79.5     | 2300          | USDA    |
| <b>RIMMA0466</b> | PI 571577  |             | Confite Puneno        | Apurimac, Peru               | -14.3    | -72.9     | 3600          | USDA    |
| <b>RIMMA0467</b> | PI 571871  |             | Paro                  | Apurimac, Peru               | -13.6    | -72.9     | 2800          | USDA    |
| <b>RIMMA0468</b> | PI 571960  |             | Sarco                 | Ancash, Peru                 | -9.4     | -77.2     | 3150          | USDA    |
| <b>RIMMA0473</b> | PI 445114  |             | Sabanero              | Narino, Colombia             | 1.1      | -77.6     | 3104          | USDA    |
| <b>RIMMA0656</b> | Ames 28799 |             | Culli                 | Jujuy, Argentina             | -23.2    | -65.4     | 2287          | Goodman |
| <b>RIMMA0657</b> | NSL 286594 |             | Chake Sara            | Bolivia                      | -17.5    | -65.7     | 2201          | Goodman |
| <b>RIMMA0658</b> | NSL 286812 |             | Uchuquilla            | Bolivia                      | -21.8    | -64.1     | 1948          | Goodman |
| <b>RIMMA0661</b> | PI 488066  |             | Chillo                | Ecuador                      | -2.9     | -78.7     | 2195          | Goodman |
| <b>RIMMA0662</b> | NSL 287008 |             | Cuzco                 | Ecuador                      | 0.0      | -78.0     | 2195          | Goodman |
| <b>RIMMA0663</b> | PI 488102  |             | Mishca                | Ecuador                      | 0.4      | -78.2     | 2067          | Goodman |
| <b>RIMMA0664</b> | PI 488113  |             | Blanco Blandito       | Ecuador                      | 0.4      | -78.4     | 2122          | Goodman |
| <b>RIMMA0665</b> | PI 489324  |             | Racimo de Uva         | Ecuador                      | -0.9     | -78.9     | 2931          | Goodman |
| <b>RIMMA0667</b> | Ames 28737 |             | Patillo               | Chuquisaca, Bolivia          | -21.8    | -64.1     | 2201          | NA      |
| <b>RIMMA0668</b> | Ames 28668 |             | Granada               | Puno, Peru                   | -14.9    | -70.6     | 3925          | Goodman |

<sup>a</sup> GBS data are available for the accessions in bold font.

**TABLE S2 Inference of demographic parameters**

| Mesoamerica | Model IA |
|-------------|----------|
| Likelihood  | -3052.34 |
| $N_B$       | 148,500  |
| $N_C$       | 148,500  |
| $N_1$       | 62,370   |
| $N_2$       | 86,130   |
| $N_{2P}$    | 86,130   |
| S. America  | Model IA |
| Likelihood  | -2717.64 |
| $N_B$       | 76,500   |
| $N_C$       | 76,500   |
| $N_1$       | 74,205   |
| $N_2$       | 2,295    |
| $N_{2P}$    | 346,545  |

The description of  $\alpha$ ,  $\beta$  and  $\gamma$  is in Figure 3.

$\sigma$  is a relative size of  $N_B$  to  $N_C$  ( $N_B = \sigma N_C$ ).

**TABLE S3 Summary of PHS test**

| Population  | Pattern of adaptation | No. of SNPs | No. of SNPs supported by PHS test |
|-------------|-----------------------|-------------|-----------------------------------|
| Mesoamerica | Highland adaptation   | 264         | 172 (65.2%)                       |
|             | Lowland adaptation    | 101         | 66 (65.3%)                        |
| S. America  | Highland adaptation   | 164         | 230 (71.3%)                       |
|             | Lowland adaptation    | 70          | 50 (71.4%)                        |

**TABLE S4  $F_{CT}$  between *parviglumis* and *mexicana***

| Mesoamerica          | No. of SNPs |        |            |
|----------------------|-------------|--------|------------|
|                      | Significant | NS     | Proportion |
| Significant $F_{CT}$ | 25          | 337    | 0.077      |
| NS                   | 299         | 18,493 | 0.018      |
| S. America           | No. of SNPs |        |            |
|                      | Significant | NS     | Proportion |
| Significant $F_{CT}$ | 10          | 327    | 0.070      |
| NS                   | 133         | 17,518 | 0.018      |

**TABLE S5**  $F_{ST}$  outlier SNPs and *mexicana* introgression

| Introgression status | Population  | $F_{ST}$ outlier SNPs | All other SNPs |
|----------------------|-------------|-----------------------|----------------|
| Introgressed         | Mesoamerica | 114                   | 1953           |
|                      | S. America  | 26                    | 1721           |
| Not introgressed     | Mesoamerica | 558                   | 73892          |
|                      | S. America  | 379                   | 60666          |

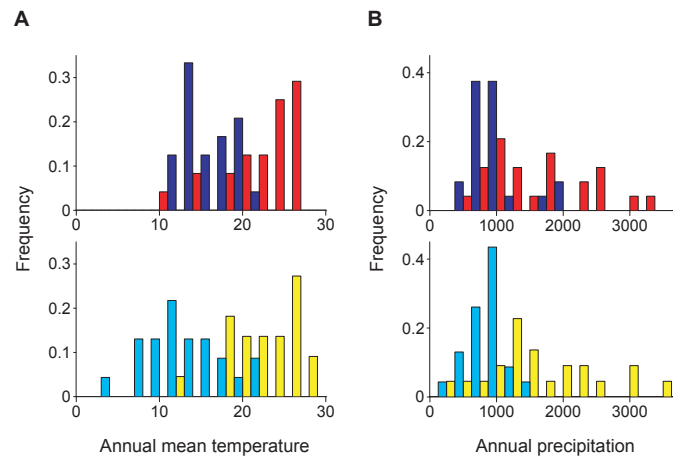

**FIGURE S1** Annual mean temperature and annual precipitation in the sampling locations of the maize landraces across Americas. Red, blue, yellow and light blue bars represent Mesoamerican lowland, Mesoamerican highland, S. American lowland and S. American highland populations, respectively.

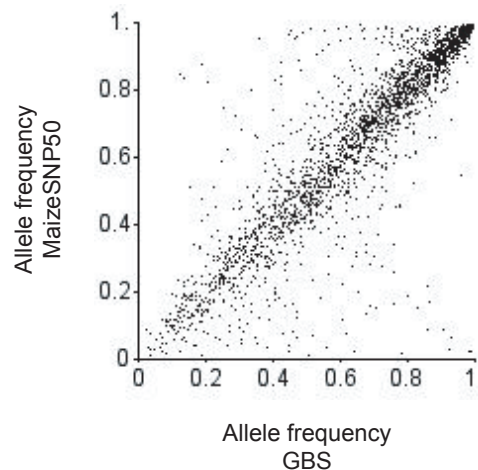

**FIGURE S2** Correlation of allele frequencies between GBS ( $x$ -axes) and MaizeSNP50 ( $y$ -axes) data. We used overlapped SNPs with  $n \geq 40$  for both data sets. Correlation coefficient is 0.890 ( $P < 10^{-5}$  by permutation test with  $10^5$  replications).

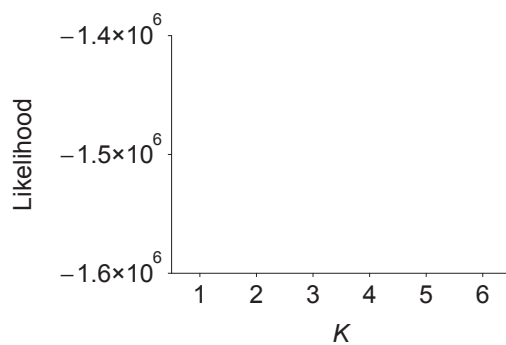

**FIGURE S3** Likelihood of STRUCTURE analysis given  $K$ . The  $x$ -axis represents  $K$  and the  $y$ -axis represents likelihood.

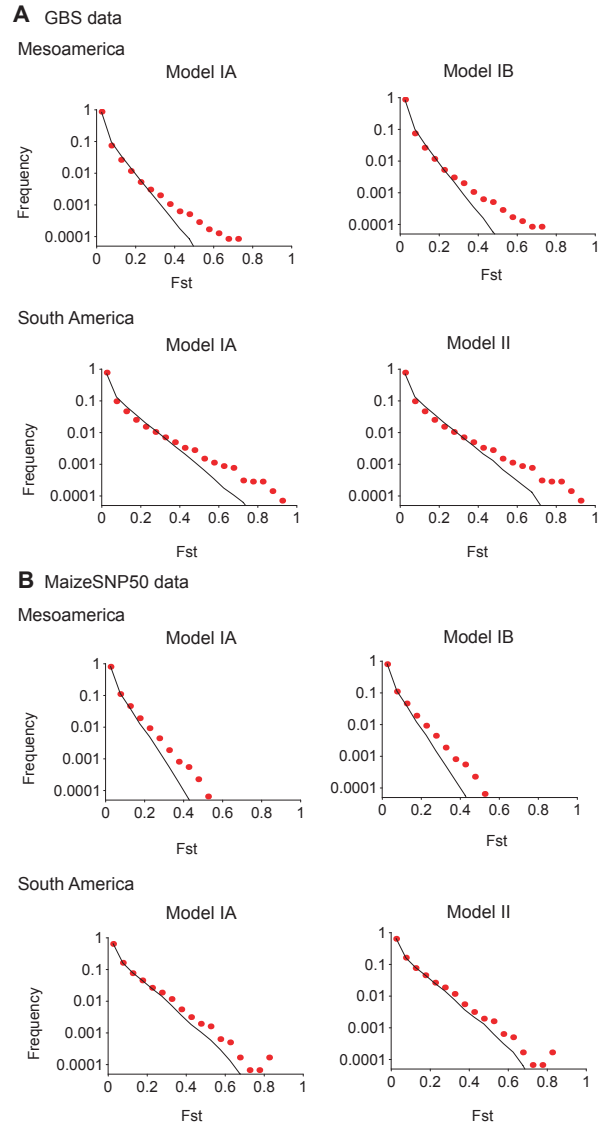

**FIGURE S4** Observed and expected distributions of  $F_{ST}$  values in GBS (A) and MaizeSNP50 data (B). The x-axes represent  $F_{ST}$  values. The y-axes represent the frequency of SNPs with  $F_{ST}$  values within a bin of 0.05 size. Red dots and solid lines indicate observed and expected distributions.

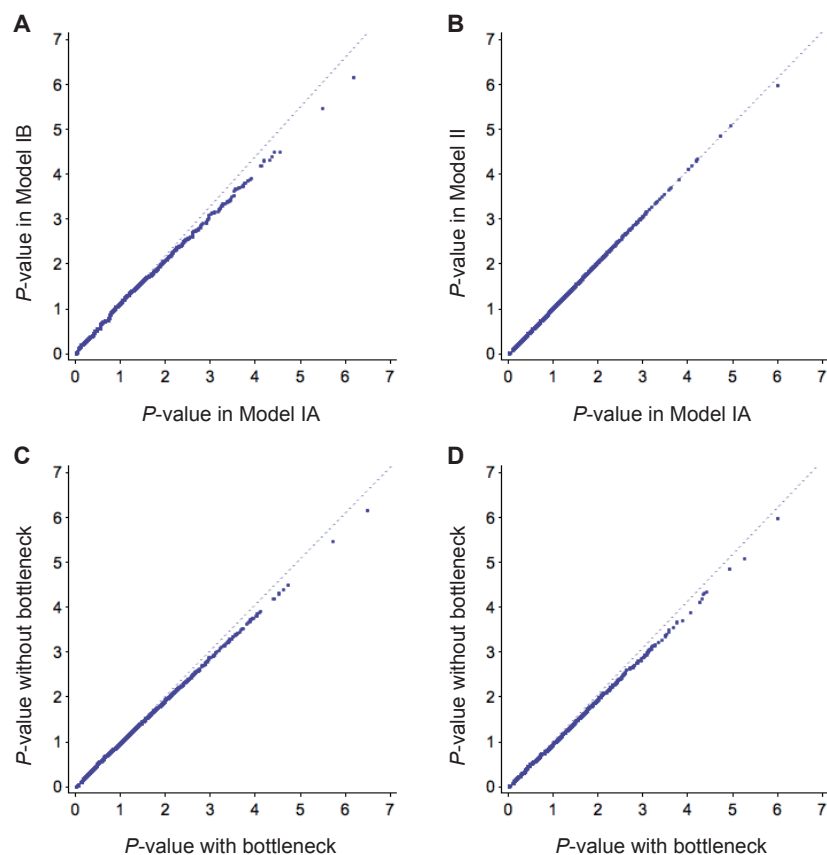

**FIGURE S5** Q-Q plot for  $-\log_{10}$ -scaled  $P$ -values of population differentiation between lowland and highland populations. (A) Model IA v.s. Model IB in Mesoamerica, (B) Model IA v.s. Model II in S. America, (C) Model with v.s. without bottleneck in Mesoamerica and (D) Model with v.s. without bottleneck in S. America.

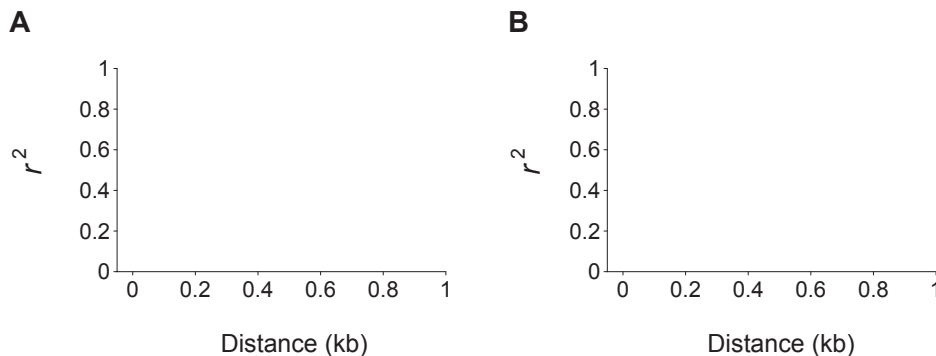

**FIGURE S6** Pattern of decay of linkage equilibrium in Mesoamerica (A) and S. America (B). Red and blue dots represent low- and highland population, respectively.  $r^2$  values were calculated as a statistics and averaged within 10-bp bins of distance between SNPs. The  $x$ - and  $y$ -axes represent distance between SNPs (kb) and average  $r^2$  values.



## File S1

### Directionality of adaptation

We classified the patterns of allelic differentiation among highland and lowland populations in Mesoamerica and S. America together with the information of *parviglumis* in an *ad hoc* manner; the allelic differentiation pattern is consistent with highland or lowland adaptation scenario. In Figure I, we illustrate the frequency of putative ancestral and derived alleles in the five populations, drawn by red and blue, respectively.

First, we focus on the SNPs with the signature of adaptation only in Mesoamerican populations (Figure IA). The first and second rows shows the typical patterns of highland adaptation with *parviglumis* data available. We simply assume that the allele in higher frequency in *parviglumis* is ancestral.

Both rows show the consistent pattern to highland adaptation in Mesoamerica because the frequency of the putative derived allele in Mesoamerican highlands is highly differentiated from those in both *parviglumis* and Mesoamerican lowlands. The patterns in S. America are different between the first and second rows. However, we do not take the patterns in S. American populations into account because there is no adaptive signature in S. American. On the other hand, we should consider the allelic pattern in S. America in the case of the third row; we cannot utilize the information of *parviglumis*. It is impossible to infer the ancestral allele, so we assume the pattern is consistent with highland adaptation if one allele is in higher frequency in Mesoamerican lowlands and S. American populations and the others is in higher frequency in Mesoamerican highlands. We classified the SNPs into lowland adaptation in the same way (from fourth to sixth rows in Figure IA).

Next, we consider the SNPs with the signatures of adaptation in both Mesoamerica and S. America (Figure IB). The pattern in the first row is consistent with parallel highland adaptation, whereas the second row shows parallel lowland adaptation. We cannot infer lowland or highland adaptation without the outgroup, so we ignore such SNPs. The pattern in the third row is the special case: the allele frequency is similar between Mesoamerican lowlands and S. American highlands and similar between Mesoamerican highlands and S. American lowlands. This pattern could be explained by that the SNP is linked to a read adaptive SNP and recombination breaks down the linkage between them.

Finally, we tested whether PHS test supports highland and lowland adaptation scenario. Consider the case of highland adaptation. We assumed that the putative derived allele is adaptive in highlands and checked whether the haplotype length is longer in highlands than that in lowlands. However, haplotype length cannot be compared directly because the derived allele frequency is different between highlands and lowlands. Thus, we compared the empirical quantile of PHS test as a indicator of haplotype length given allele frequency ( $\Pr(PHS_{xA} \leq PHS_{null|p})$  in Materials and Methods). We just say that the PHS test is consistent if the empirical quantile in highlands is smaller than that in lowlands (haplotype length is longer as the empirical quantile is smaller). The result is summarized in Table S3.

**A** Mesoamerica-specific adaptation

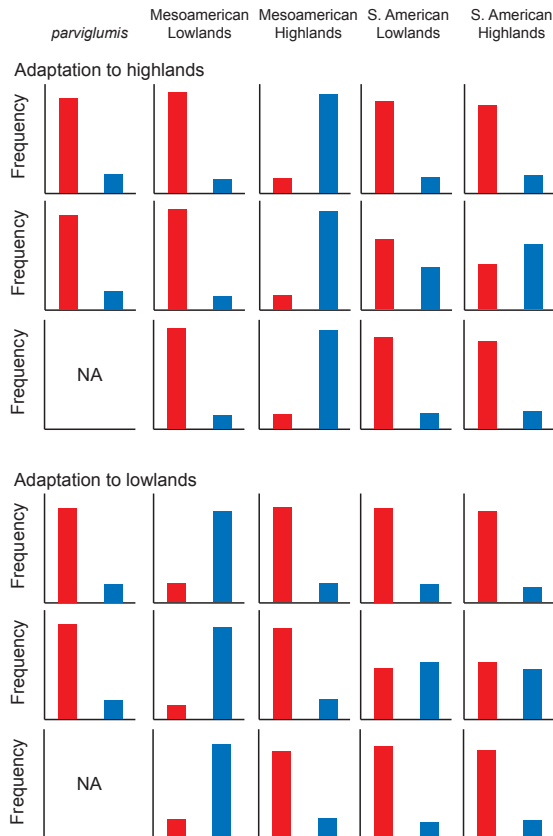

**B** Adaptation both in Mesoamerica and South America

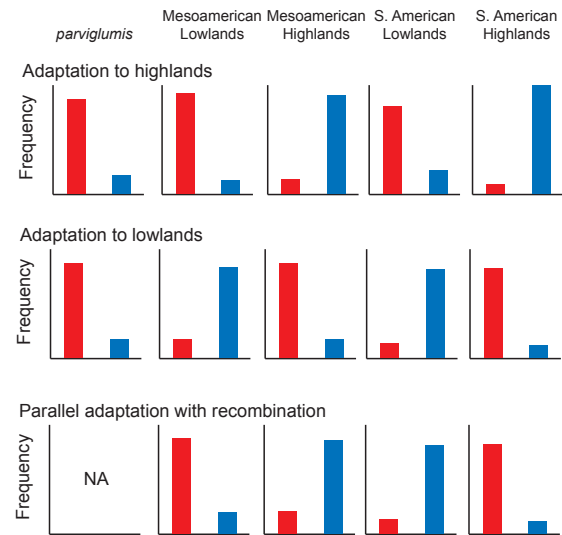

**FIGURE I** Illustration of allele frequency changes in maize and *parviglumis*. Red and blue bars represent the allele frequency of ancestral and derived, adaptive alleles, respectively. The allele frequencies in the five populations are shown: *parviglumis*, Mesoamerican lowlands and highlands, and S. America lowlands and highlands. NA in *parviglumis* indicates that there is no SNP data in the site.
